# 1 **Early mechanisms of aortic failure in** 2 **a zebrafish model for thoracic aortic** 3 **dissection and rupture**

4 Michiel Vanhooydonck MSc.<sup>1</sup>, Maxim Verlee MD.<sup>1</sup>, Marta Santana Silva MSc.<sup>1</sup>, Lore  
5 Pottie PhD.<sup>1</sup>, Annekatrien Boel PhD.<sup>2</sup>, Matthias Van Impe MSc.<sup>3</sup>, Hanna De Saffel  
6 BSc.<sup>1</sup>, Lisa Caboor BSc.<sup>1</sup>, Piyanoot Tapaneeeyaphan MSc.<sup>1</sup>, Anne Bonnin PhD.<sup>4</sup>, Patrick  
7 Segers PhD.<sup>3</sup>, Adelbert De Clercq PhD.<sup>5</sup>, Andy Willaert PhD.<sup>1</sup>, Delfien Syx PhD.<sup>1</sup>,  
8 Patrick Sips PhD.<sup>1a</sup>, Bert Callewaert MD. PhD.<sup>1a\*</sup>

9  
10 <sup>1</sup> Center for Medical Genetics Ghent (CMGG), Department of Biomolecular Medicine,  
11 Ghent University, 9000 Ghent, Belgium

12 <sup>2</sup> Ghent-Fertility and Stem Cell Team (G-FaST), Department for Reproductive Medicine,  
13 Ghent University, 9000 Ghent, Belgium

14 <sup>3</sup> Biophysical Models for Medical Applications (bioMMeda), Institute of Biomedical  
15 Engineering and Technology (IBiTech), Ghent University, 9000 Ghent, Belgium.

16 <sup>4</sup> Paul Scherrer Institut, Swiss Light Source, 5232 Villigen PSI, Switzerland.

17 <sup>5</sup> Evolutionary Developmental Biology, Biology Department, Ghent University, 9000  
18 Ghent, Belgium.

19 <sup>a</sup> Bert Callewaert and Patrick Sips contributed equally as senior authors.

20  
21 \*Corresponding Author: Bert Callewaert, PhD, MD

22 Bert.Callewaert@Ugent.be; ORCID: 0000-0002-9743-4205

23 Word count: 8888

## 24 **ABSTRACT**

25 Thoracic aortic aneurysm and dissection (TAAD) associates with a high mortality rate.  
26 Despite the existence of different mouse models for TAAD, the underlying disease  
27 mechanisms remain elusive. Treatment options are limited and mainly consist of  
28 surgical repair at critical aortic diameters as current pharmacological interventions are  
29 unable to stop disease progression.

30

31 In humans, loss of function (LOF) of *SMAD3* and *SMAD6* impairs vascular homeostasis,  
32 increasing the risk for TAAD. We developed a zebrafish model for thoracic aortic  
33 dissection/rupture by targeting both ohnologs of *smad3* and *smad6*. At 10 days post  
34 fertilization, we found an increased diameter of the ventral aorta in *smad3a<sup>-/-</sup>;smad3b<sup>-/-</sup>*  
35 double knockout zebrafish, while *smad6a<sup>-/-</sup>;smad6b<sup>-/-</sup>* double knockout zebrafish have a  
36 reduced aortic diameter associated with early mortality. We discovered that a *smad3a<sup>-/-</sup>*  
37 *;smad3b<sup>-/-</sup>;smad6a<sup>-/-</sup>;smad6b<sup>-/-</sup>* quadruple knockout (qKO) zebrafish model is viable and  
38 survives to adulthood, although exposure to stress leads to sudden death. Histological  
39 analysis of the adult ventral aorta shows medial elastolysis, aortic dissections and  
40 ruptures at sites exposed to high biomechanical stress. RNA-sequencing of 5 days post  
41 fertilization qKO zebrafish indicates a profile of reduced negative regulation of  
42 proteolysis and upregulation of melanogenesis, a previously unaddressed pathway in  
43 this pathology. We confirm that pharmacological modulation of tyrosinase, the enzyme  
44 responsible for the production of melanin, influences aortic morphology.

45

46 Overall, the qKO mutant, thus far the only known zebrafish model of thoracic aortic  
47 dissection and rupture, reveals novel SMAD3/6-dependent pathways that impact  
48 thoracic aortic homeostasis, in this way opening avenues for the development of novel  
49 treatments in TAAD.

## 50 NON-STANDARD ABBREVIATIONS AND ACRONYMS

|         |                                                                             |
|---------|-----------------------------------------------------------------------------|
| AA3     | aortic arch 3                                                               |
| AA4     | aortic arch 4                                                               |
| BMPs    | bone morphogenetic proteins                                                 |
| Co-SMAD | common mediator SMAD                                                        |
| CPM     | counts per million                                                          |
| DEG     | differentially expressed genes                                              |
| DKO     | double knockout                                                             |
| dpf     | days post fertilization                                                     |
| ECM     | extracellular matrix                                                        |
| FDR     | false discovery rate                                                        |
| GDFs    | differentiation factors                                                     |
| GO      | gene ontology                                                               |
| GRCz11  | Genome Reference Consortium Zebrafish Build 11                              |
| GSEA    | gene set enrichment analysis                                                |
| ID      | intellectual disability                                                     |
| I-SMAD  | inhibitory SMAD                                                             |
| KEGG    | Kyoto Encyclopedia of Genes and Genomes                                     |
| LDS3    | Loeys-Diets syndrome type 3                                                 |
| LOF     | loss of function                                                            |
| mpf     | months post fertilization                                                   |
| MR      | magnetic resonance                                                          |
| PSI     | Paul Scherrer Institut                                                      |
| PTU     | 1-phenyl-2-thiourea treatment                                               |
| qKO     | $smad3a^{-/-}; smad3b^{-/-}; smad6a^{-/-}; smad6b^{-/-}$ quadruple knockout |
| RO      | reverse osmosis                                                             |
| R-SMAD  | receptor-regulated SMAD                                                     |

|                     |                                                                             |
|---------------------|-----------------------------------------------------------------------------|
| SKO                 | single knockout                                                             |
| <i>smad3a/b</i> DKO | <i>smad3a</i> <sup>-/-</sup> ; <i>smad3b</i> <sup>-/-</sup> double knockout |
| <i>smad6a/b</i> DKO | <i>smad6a</i> <sup>-/-</sup> ; <i>smad6b</i> <sup>-/-</sup> double knockout |
| TAA                 | thoracic aortic aneurysm                                                    |
| TAAD                | thoracic aortic aneurysm and dissection                                     |
| TAD                 | thoracic aortic dissection                                                  |
| TEM                 | transmission electron microscopy                                            |
| TGF-β               | transforming growth factor β                                                |
| ZIRC                | Zebrafish International Research Center                                     |

## 52 INTRODUCTION

53 Thoracic aortic dissection (TAD) affects 3-4 individuals per 100,000 people per year<sup>1</sup>.  
54 This life-threatening event is often, but not exclusively, preceded by thoracic aortic  
55 aneurysm (TAA). The disease mechanisms are incompletely understood, but evidence  
56 from genetic disorders implicates altered cell-matrix interactions (by impaired  
57 hemodynamic sensing or impaired matrix assembly), as well as aberrant transforming  
58 growth factor  $\beta$  (TGF- $\beta$ ) signaling<sup>2-5</sup>. Despite several mouse models for TAD<sup>6</sup>, the initial  
59 molecular mechanisms remain obscure.

60 Members of the TGF- $\beta$  superfamily include TGF- $\beta$  proteins, bone morphogenetic  
61 proteins (BMPs), activins, and growth and differentiation factors (GDFs). Binding of  
62 TGF- $\beta$  to the tetrameric TGF $\beta$ -receptor complex results in phosphorylation of the  
63 receptor-regulated (R-) SMAD2 and -3 proteins. Binding of BMP and GDF to the  
64 tetrameric BMP-receptor complex results in phosphorylation of R-SMAD1, -5, and -8.  
65 Phosphorylated R-SMAD proteins recruit the common mediator (Co-) SMAD4 to form a  
66 heterotrimeric complex and translocate to the nucleus to activate the transcription of the  
67 TGF- $\beta$  or BMP target genes<sup>7</sup>. The TGF- $\beta$  and BMP signaling is negatively regulated by  
68 the inhibitory (I-) SMAD6 and -7 proteins. I-SMAD6 primarily suppresses the pathway  
69 activated by the BMP-receptor, whereas I-SMAD7 inhibits both the TGF- $\beta$  and BMP  
70 induced pathways<sup>8</sup>.

71 Pathogenic variants in *SMAD3* cause Loey's-Dietz syndrome type 3 (LDS3). LDS3  
72 typically presents with early-onset osteo-arthritis, and arterial aneurysm and dissection,  
73 mainly affecting the ascending aorta. Other features include arterial tortuosity, mitral  
74 valve prolapse and craniofacial characteristics<sup>2,9</sup>. Pathogenic variants in *SMAD6* are

75 associated with craniosynostosis<sup>10</sup>, radio-ulnar synostosis<sup>11</sup> or congenital heart disease  
76 including bicuspid aortic valve<sup>12</sup> with or without TAAD<sup>13</sup> and Shone complex with a  
77 hypoplastic ascending aorta and arch<sup>14</sup>. Biallelic variants in *SMAD6* underly more  
78 complex cardiovascular phenotypes<sup>15</sup>. Interestingly, identical pathogenic variants in  
79 *SMAD6* may result in either cardiovascular anomalies, craniosynostosis or radioulnar  
80 synostosis<sup>13</sup>. Because *SMAD3* and *SMAD6* have been in linkage disequilibrium  
81 throughout evolution from teleost fish to human, it has been postulated that *SMAD3*  
82 could have a modifier role on *SMAD6* deficiency<sup>16</sup>. In line with this observation, we  
83 identified a 1.5 Mb 15q22.31-15q23 microdeletion encompassing *SMAD3* and *SMAD6*  
84 in an 11-year-old-boy and his 33-year-old mother, both presenting with bicuspid aortic  
85 valve and arterial tortuosity, but no aneurysms, along with skeletal and cutaneous  
86 anomalies of LDS3, hinting that deletion of *SMAD6* may influence the phenotype  
87 caused by *SMAD3* LOF (**Supplementary Case Presentation**<sup>17</sup>). Due to the teleost  
88 specific genome duplication, zebrafish have two ohnolog copies for both *SMAD3* and  
89 *SMAD6*<sup>18</sup>. We established zebrafish models deficient for each of these ohnologs  
90 identified as *smad3a* and *smad3b*, and *smad6a* and *smad6b*, respectively. The human  
91 *SMAD3* (ENSP00000332973) protein has a sequence similarity of 97.17% with  
92 zebrafish *Smad3a* (ENSDARP00000045373) and 93.4% with zebrafish *Smad3b*  
93 (ENSDARP00000043454). *SMAD6* (ENSP00000288840) is less conserved with a  
94 similarity of 53.3% and 62.38% with zebrafish *Smad6a* (ENSDARP00000112408) and  
95 *Smad6b* (ENSDARP00000091342) respectively. *Smad6a* and *Smad6b* show 58.33%  
96 protein sequence similarity, which is considered large enough to assume similar

97 function<sup>19</sup>. The sequence similarity and the same spatial expression patterns of *Smad3a*  
98 and *Smad3b* as well as *Smad6a* and *smad6b* suggest<sup>20–22</sup>.

99 In this study, we investigated modifying effects of *smad3a/smاد3b* on *smad6a/smاد6b*  
100 and vice versa which enabled us to model TAAD in zebrafish. Additionally, we identified  
101 early molecular mechanisms in aortic failure to identify druggable pathways.



## 102 **METHODS**

### 103 ***Ethics statement and housing***

104 This study was approved by the Animal Ethics Committee of the Ghent University  
105 Faculty of Medicine and Health Sciences (Permit number: ECD 14/70) and housed  
106 adhering to the general guidelines, in agreement with EU Directive 2010/63/EU for  
107 laboratory animals<sup>23,24</sup>.

### 108 ***Zebrafish lines: design and generation***

109 *Smad3a*<sup>sa2363/+</sup> was acquired from the Zebrafish International Research Center (ZIRC).  
110 All other models were generated using CRISPR/Cas9 gene editing technology utilizing  
111 CRISPRdirect software<sup>25-27</sup>. Specific gBlocks for all target sites are listed in  
112 **Supplementary Table 1**. Genotyping primers are given in **Supplementary Table 2**. All  
113 variants are described using Genome Reference Consortium Zebrafish Build 11  
114 (GRCz11) and described in **Supplementary Table 3**.

### 115 ***Vasculogenesis in embryos***

116 Zebrafish were outcrossed to the transgenic *Tg(fli1:EGFP)* line in order to visualize  
117 endothelial cells as previously described<sup>28</sup>. Head length was used as normalization  
118 factor. An overview of the acquired measurements and specific breeding schemes are  
119 given in **Supplementary Fig. 1a-c**.

### 120 ***3D reconstruction of the ventral aorta in adult zebrafish***

121 Serial 5 µm paraffin cross sections of the entire ventral aorta of zebrafish between 6 and  
122 13 months post fertilization (mpf) were stained with Weigert's iron hematoxylin, rinsed in  
123 water and stained with Resorcin-Fuchsin for one hour followed by two wash steps in

124 95% ethanol and one wash with reverse osmosis (RO) water. Slides were dehydrated  
125 and mounted with Entellan mounting medium. Pictures of serial sections were aligned  
126 via the TrakEM2 1.0<sup>29-31</sup> and 3D reconstructed with Mimics 24.0 software.

### 127 ***Ultrasound analysis***

128 Ultrasound analysis was performed on zebrafish of 6-7 mpf as previously described<sup>32</sup>.  
129 All measurements were performed in Vevo Lab 5.5.0.

### 130 ***Acute net handling stress induction***

131 Induction of handling stress was adapted from previously described procedures<sup>33</sup>. Six  
132 mpf zebrafish were netted and air suspended for 90 seconds, returned to the housing  
133 tank for 90 seconds, netted and air suspended for 90 seconds and returned to the  
134 housing tank.

### 135 ***Alizarin Red staining for mineralized bone***

136 Alizarin red staining for mineralized bone was performed as previously described<sup>34</sup>, at  
137 13 mpf. The qKO were stained after sudden death between 6 and 13 mpf.

138 Ectopic bone on the sinistral skeletal elements of the vertebral bodies was scored on  
139 abdominal and caudal vertebrae of adult zebrafish in lateral position<sup>35</sup>.

140 Skull morphometrics were performed on images of the zebrafish heads in lateral  
141 position. Acquired lengths were measured in ImageJ and are given in **Supplementary**  
142 **Fig. 1b**. Diameter of the eye was used for normalization since eye diameter correlates  
143 with standard length<sup>36</sup>. Cranial surface area was measured with standard length as  
144 normalization factor.

## 145 ***Transcriptome analysis***

146 RNA sequencing was performed on five pools, each containing five qKO or WT control  
147 cousins. Following RNA extraction (RNeasy® Mini kit), libraries were prepared (TruSeq  
148 Stranded Total RNA kit from Illumina) and sequenced on a NovaSeq6000 instrument  
149 (Illumina).

150 Following quality control<sup>37,38</sup>, raw reads were mapped (STAR<sup>39</sup>) and through R  
151 packages, additional normalization and filtering was performed<sup>40-42</sup>. The top list of DEG  
152 was obtain via differential expression analysis (edgeR), with the necessary adjustments  
153 to account for multiple testing<sup>43,44</sup>. An adjusted p-value of 0.05 and a fold change of 2  
154 were used as thresholds to determine genes of relevance. Finally gene enrichment  
155 analysis was carried out<sup>45</sup>. Further details can be found in the **Supplementary**  
156 **Methods**.

## 157 ***Synchrotron phase contrast micro Computed tomography imaging***

158 Propagation-based phase-contrast synchrotron X-ray imaging was performed at the  
159 TOMCAT (X02DA) beamline of the Swiss Light Source (Paul Scherrer Institute in  
160 Villigen, Switzerland) as previously described<sup>46</sup>. Tomographic reconstruction was  
161 performed using the Gridrec algorithm after applying the Paganin phase retrieval  
162 method<sup>47,48</sup>.

## 163 ***3D Biomechanical modeling to assess principal stress at systolic peak in*** 164 ***the aortic wall***

165 In a previous study<sup>46</sup>, zebrafish-specific 3D biomechanical fluid-structure interaction  
166 models of five different 13-month-old zebrafish were developed. All parameter settings

167 as described in<sup>46</sup> were maintained except for flow through right aortic arch 2, 3 and 4,  
168 which was set to nearly zero in order to mimic the vascular organization found in qKO  
169 mutants.

### 170 ***Transmission electron microscopy***

171 In short, WT and qKO zebrafish of 16 mpf were euthanized, fixed in Karnovsky fixative,  
172 followed by decalcification for three weeks. Post-fixation in 1% osmium tetroxide, 0.1M  
173 cacodylate buffer with 8% saccharose and 0.004% CaCl<sub>2</sub> was followed by *en bloc*  
174 staining in 1% aqueous uranyl acetate. After dehydration, the samples were embedded  
175 in Spurr's resin. 80 nm sections were stained with uranyl acetate and lead citrate and  
176 examined by transmission electron microscopy (TEM) (JEM 1010, JEOL) equipped with  
177 a CCD side-mounted Veleta camera (EMSIS).

### 178 ***Swimming behavior studies***

179 Swimming behavior of 9 mpf WT, *smad3a*<sup>+/-</sup>; *smad3b*<sup>-/-</sup>; *smad6a*<sup>+/-</sup>; *smad6b*<sup>-/-</sup> and qKO  
180 zebrafish was analyzed in a custom-made dark observation chamber (Noldus) equipped  
181 with the Basler GenICam. Data was analyzed using the EthoVision XT 17 software  
182 (Noldus). Zebrafish were placed individually in a tank and could acclimatize for 10  
183 minutes before a 10-minute test period, was performed in the dark. Movement is  
184 depicted as total distance travelled during the test period, normalized for standard  
185 length. Movement frequency was also recorded.

186 ***1-phenyl-2-thiourea treatment***

187 At 1 day post fertilization (dpf), 0.003% 1-phenyl-2-thiourea treatment (PTU) in E3  
188 medium was administered to WT zebrafish. The medium was changed daily until 10 dpf.  
189 Starting from 5 dpf, zebrafish were given dry food for 2 hours daily, after which the  
190 medium was refreshed again.

191 ***Statistical analyses***

192 All statistical analyses were performed with GraphPad Prism version 10.1.1 for  
193 Windows (GraphPad Software, Boston, Massachusetts USA, [www.graphpad.com](http://www.graphpad.com)).  
194 Kruskal-Wallis test with Dunn's multiple comparisons test against WT controls was used  
195 to determine if there was an increase in ectopic bone on the skeletal elements of the  
196 vertebral bodies. For PTU treatment, a two-tailed t-test was used, when standard  
197 deviation differed significantly between the groups, Welch's correction was applied. For  
198 all other comparisons, One-way ANOVA with Dunnett's multiple comparison test against  
199 WT controls was used. Brown-Forsythe and Welch ANOVA with Dunnett's T3 multiple  
200 comparison test against WT controls was used when the genotypes showed a  
201 significantly different standard deviation, determined with the Brown-Forsythe test.

## 202 RESULTS

### 203 ***Disruption of one of the smad3 or smad6 ohnologs does not show a*** 204 ***cardiovascular or skeletal phenotype in zebrafish***

205 Using CRISPR/Cas9 gene editing technology, we generated frameshift indels in the  
206 *smad3b*, *smad6a*, and *smad6b* genes, resulting in the generation of a premature  
207 termination codon in each mutant: *smad3b*<sup>c.455\_459delinsATG/c.455\_459delinsATG</sup>,  
208 *smad6a*<sup>c.905\_906delTG/c.905\_906delTG</sup> and *smad6b*<sup>c.283\_287delACGGT/c.283\_287delACGGT</sup>  
209 (**Supplementary Table 3**). To study *smad3a* function we made use of the available  
210 *Smad3a*<sup>sa2363/+</sup> line, in which a premature termination codon is introduced (c.682G>T).  
211 For the reader's benefit, we will use the term single knockout (SKO) for *smad3a*,  
212 *smad3b*, *smad6a* and *smad6b* single homozygous knockout zebrafish. At 5 dpf,  
213 measurement of the ventral aorta in the transgenic *Tg(fli1:EGFP)* reporter background  
214 is similar for heterozygous and SKO zebrafish for each gene as compared to sibling  
215 controls (**Error! Reference source not found.**).

216 However, incross of *smad3a* SKO results in 100% embryonic lethality at 2 dpf with  
217 severe body axis deformities and pericardial edema formation, while incross of *smad3b*  
218 SKO and *smad3a*<sup>+/-</sup>;*smad3b*<sup>-/-</sup> shows offspring with normal survival, suggesting that  
219 maternal *smad3a* expression is necessary for early embryonic survival, which is  
220 supported by previously published results<sup>20</sup>. Incross of *smad6a* or *smad6b* SKO showed  
221 normal survival.

222 In 6-7 mpf adult zebrafish, ultrasound measurements show that all measured  
223 parameters of cardiac function are similar in all SKO compared heterozygous mutants  
224 and sibling controls, with an exception of *smad6a*<sup>-/-</sup> which shows a small increase in

225 normalized projected surface area of the ventricle in diastole (**Error! Reference source**  
226 **not found.**).

227 In addition, skeletal evaluation and alizarin red staining for mineralized bone at 13 mpf  
228 do not show any vertebral column deformities or an increase in ectopic bone formation  
229 (**Figure , Error! Reference source not found.-6**). Skull morphometrics are normal,  
230 except for the *smad3a* SKO, in which a decrease of the snout to frontal bone distance is  
231 observed (**Error! Reference source not found.-8**).

### 232 ***Smad3a/b* DKO and *smad6a/b* DKO show altered vasculogenesis**

233 To bypass embryonic lethality due to loss of maternal *smad3a*, we performed a cross  
234 between a *smad3a*<sup>+/-</sup>;*smad3b*<sup>-/-</sup> female and *smad3a/b* DKO male zebrafish to obtain  
235 50% *smad3a*<sup>+/-</sup>;*smad3b*<sup>-/-</sup> and 50% *smad3a/b* DKO zebrafish, which survive normally. At  
236 10 dpf, the *smad3a/b* DKO show a significant increase in normalized surface area of the  
237 aortic segment between aortic arch 3 and 4 ( $p = 0.0449$ ), a reduced normalized length  
238 of the segment ( $p = 0.0366$ ) and an increased normalized mean aortic diameter ( $p =$   
239  $0.0335$ ). The diameter adjacent to the bulbus arteriosus remains unchanged (**Error!**  
240 **Reference source not found.**).

241 The *smad6a/b* DKO show normal early survival rates, as indicated by normal Mendelian  
242 distribution of all genotypes in 10 dpf-old offspring obtained from *smad6a*<sup>+/-</sup>;*smad6b*<sup>+/-</sup>  
243 incrosses. Nevertheless, *smad6a/b* DKO zebrafish are unable to survive to adulthood.

244 *Smad6a/b* DKO zebrafish show a significant reduction of the ventral aortic diameter at  
245 10 dpf ( $p < 0.0001$ ). The diameter adjacent to the bulbus arteriosus as well as the  
246 normalized surface area of the aorta segment is decreased ( $p < 0.0001$ ,  $p < 0.0001$ ). To a

247 lesser extent, the diameter of the aorta segment of *smad6a*<sup>+/-</sup>;*smad6b*<sup>-/-</sup> is also reduced  
248 (p = 0.0016), while the length of the aorta segment remains unchanged in all *smad6*  
249 knockouts (**Error! Reference source not found.**).

250 Ultrasound analysis at 6-7 mpf of all viable *smad3* (*smad3a*<sup>+/-</sup>;*smad3b*<sup>-/-</sup>, *smad3a*<sup>-/-</sup>  
251 ;*smad3b*<sup>+/-</sup> and *smad3a/b* DKO) or *smad6* (*smad6a*<sup>+/-</sup>;*smad6b*<sup>-/-</sup> and *smad6a*<sup>-/-</sup>;*smad6b*<sup>+/-</sup>  
252 ) KO combinations do not show any significant differences in cardiac parameters (**Error!**  
253 **Reference source not found.-4**).

### 254 ***Loss of smad3 ohnologs in zebrafish induces ectopic bone formation and*** 255 ***vertebral column deformations***

256 Alizarin red staining for mineralized bone on 13 mpf *smad3a/b* DKO zebrafish shows  
257 ectopic bone formation on the ribs, neural arches, neural spines, haemal arches, and  
258 haemal spines (p = 0.0012) (**Figure** ) as well as hyperlordosis, notochord mineralization  
259 and notochord sheet mineralization (**Supplementary Fig 5**). Overall, the thickness of  
260 the haemal arches is increased (**Fig. 4**) and the normalized surface area of the cranial  
261 roof is reduced compared to WT controls (p = 0.0101) (**Error! Reference source not**  
262 **found.**). The presence of a single WT copy of either *smad3a* or *smad3b* prevents any of  
263 these skeletal malformations to develop (**Fig. 4, Supplementary Fig. 8**). Skull  
264 morphometrics show a mild decrease of the distance between the tip of the snout and  
265 the most posterior part of the supraoccipital bone in *smad3a*<sup>-/-</sup> zebrafish (p = 0.0486),  
266 but not in the *smad3a/b* DKO (**Error! Reference source not found.**).

267 Likewise, a significant increase in ectopic bone can be seen in 13 mpf *smad6a*<sup>-/-</sup>  
268 ;*smad6b*<sup>+/-</sup> (p = 0.0022) as well as in *smad6a*<sup>+/-</sup>;*smad6*<sup>-/-</sup> (p = 0.0033) zebrafish,



269 although to a lesser extent than observed in the *smad3a/b* DKO (**Figure** ). Since the  
270 *smad6a/b* DKO does not reach adulthood, these features cannot be analyzed in this  
271 genotype. No premature fusion of the cranial roof bones is observed, and the  
272 normalized surface areas of the cranial roof are similar to controls (**Error! Reference**  
273 **source not found.**). Skull morphometrics do show a decrease in length between the tip  
274 of the snout and tip of the frontal bone in *smad6a<sup>+/-</sup>;smad6b<sup>-/-</sup>* mutants ( $p = 0.0056$ )  
275 (**Error! Reference source not found.**).

### 276 ***Loss of smad3 and smad6 ohnologs in zebrafish induces ventral aortic*** 277 ***dissection and rupture***

278 To investigate potential modifying effects of *smad3* on *smad6* and vice versa, we  
279 generated a *smad3a<sup>-/-</sup>;smad3b<sup>-/-</sup>;smad6a<sup>-/-</sup>;smad6b<sup>-/-</sup>* qKO zebrafish line  
280 (**Supplementary Table 3**).

281 Unlike the *smad6a/b* DKO, qKO zebrafish reach adulthood and generate viable  
282 offspring. Microscopic analysis of vasculogenesis at 10 dpf shows a severe decrease of  
283 the normalized surface area of the aortic projection ( $p < 0.0001$ ), the normalized mean  
284 diameter of the aortic segment between aortic arch 3 and 4 ( $p = 0.0241$ ), and the  
285 normalized diameter adjacent to the bulbus arteriosus ( $p = 0.0005$ ) compared to WT  
286 controls, similar to *smad3a<sup>+/-</sup>;smad3b<sup>-/-</sup>;smad6a<sup>+/-</sup>;smad6b<sup>-/-</sup>* zebrafish ( $p < 0.0001$ ,  
287  $p < 0.0001$ ,  $p = 0.0032$ , respectively). The normalized length of the aortic segment is only  
288 decreased in the qKO ( $p = 0.006$ ) (**Fig. 1, Supplementary Fig. 9**). In addition, the qKO  
289 shows tortuosity of the ventral aorta, aortic arches and hypobranchial artery (**Error!**  
290 **Reference source not found., Error! Reference source not found.10**).

291 In adult qKO zebrafish, we observed sudden deaths, mostly after breeding, netting, or  
292 changing the tank positions. To investigate stress as a trigger, we performed a netting  
293 test that is harmless in WT controls, but results in a mortality rate of 60% in qKO.  
294 Sudden death associated with a red discoloration anterior in the abdominal region.  
295 Sectioning of the entire ventral aorta and staining with Resorcin-Fuchsin to visualize the  
296 elastic fibers shows the presence of aortic intramural hematomas and false lumens in  
297 multiple qKO. 3D-reconstructions of the aorta based on histological images and from  
298 synchrotron micro-CT images of intact zebrafish, confirm the presence of regions of  
299 ventral aortic damage (**Fig. 2** and **Supplementary movie 1-8**).

300 Regions of ventral aortic damage start close to a branching point (6/6 qKO, 0/4 WT) and  
301 dissection or rupture is present at the most affected sites, (5/6 qKO, 0/4 WT). The  
302 diameter of the aortic branches is asymmetrically distributed in all qKO zebrafish (6/6  
303 qKO, 0/4 WT) with one side consistently showing narrower branches than the other. In  
304 more severe cases, one or more aortic arches are missing (2/5 qKO, 0/4 WT) or  
305 attached at the wrong side of the ventral aorta (1/6 qKO, 0/4 WT) (**Supplementary**  
306 **Movie 9-13**). No morphological differences can be detected in WT controls  
307 (**Supplementary Movie 14-16**) or *smad3a/b* DKO zebrafish (**Supplementary Movie**  
308 **17-19**).

309 TEM shows a severely decreased elastin deposition in the internal elastic lamina of 15  
310 mpf qKO zebrafish. Additionally, abnormal collagen deposition is detected near the  
311 intima of the ventral aorta (**Fig. 2**).

312 Cardiac ultrasound analysis in 6-7 mpf qKO zebrafish shows regurgitation on ventricular  
313 in- (p = 0.0009) and outflow (p<0.0001), suggestive of valve dysfunction

314 (Supplementary Fig. 11). Elastin staining of paraffin sections of the valves shows  
 315 hypertrophy of the valve interstitial cells, resulting in a more rounded appearance of the  
 316 qKO bulboventricular valve in contrast to the normal heart-shaped structure in WT  
 317 control zebrafish. Similarly, the atrioventricular valve shows hypertrophy and altered  
 318 morphology of the valve interstitial cells (

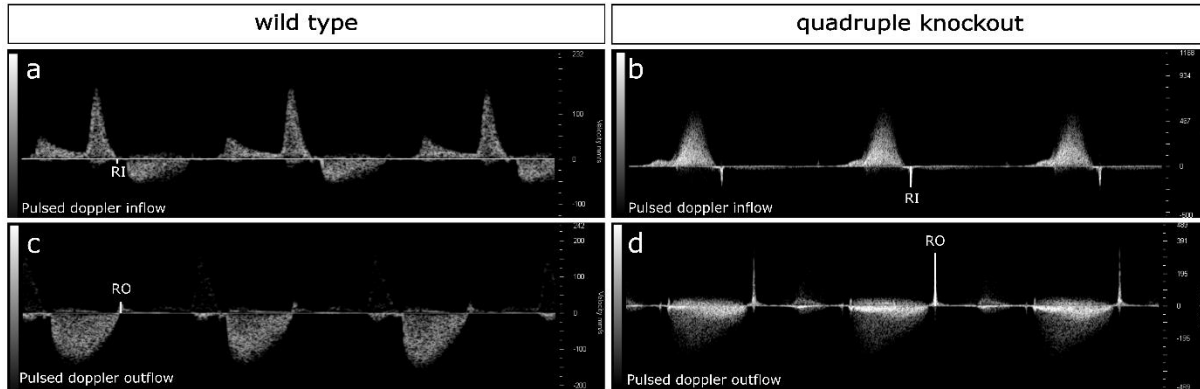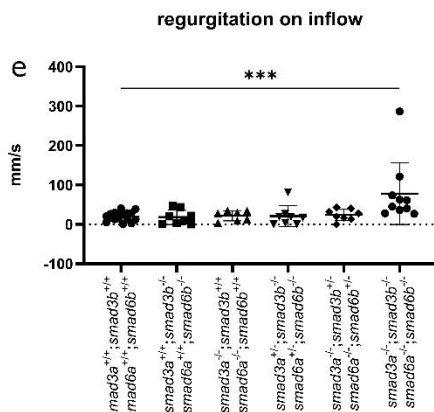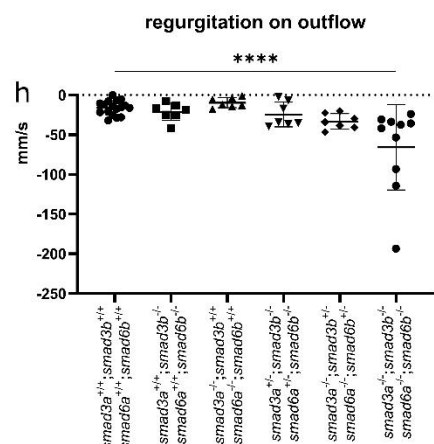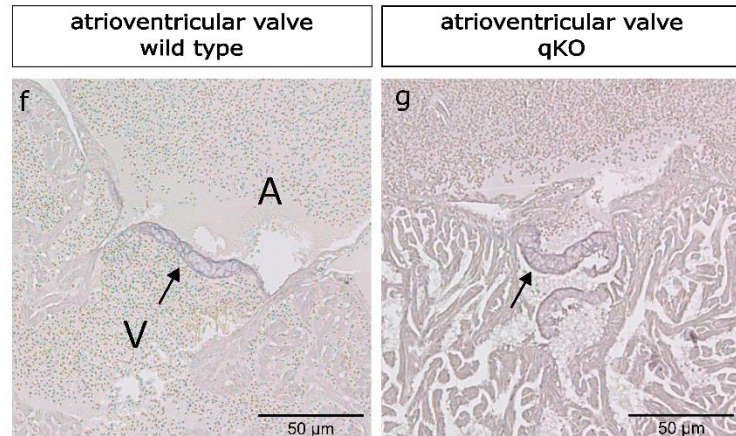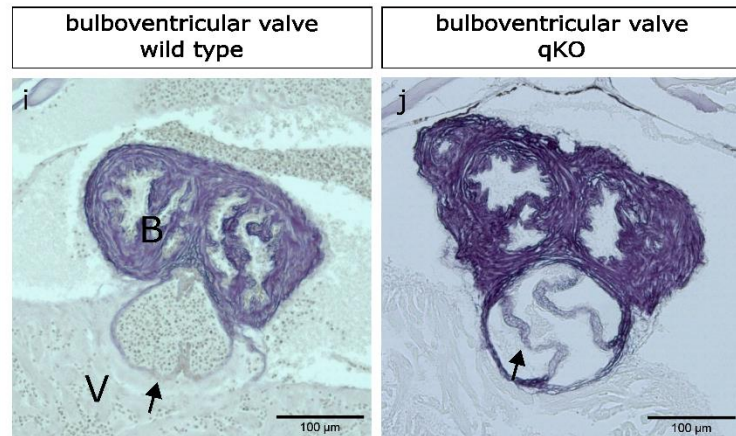

319

320 **Figure, Supplementary Fig. 12).**

321 ***Aortic damage in the qKO zebrafish correlates with increased stress at***  
322 ***branching regions***

323 In qKO zebrafish, asymmetric branching and reduction of the diameter of the aortic  
324 arches is apparent. To determine if the morphological changes of the aorta in adult qKO  
325 zebrafish increase the principal stress within the vessel wall and to identify which  
326 locations endure the largest differences, aortic morphology was compared using *in silico*  
327 simulation models representing 13 mpf WT and qKO zebrafish aortae. To model the  
328 severe reduction of the diameter of the qKO aortic arches, the blood flow through the  
329 right aortic arches (aortic arch 2, 3 and 4) was reduced to nearly zero in the model. The  
330 principal stress within the aortic wall was increased in all 5 qKO simulations, with the  
331 most affected region close to branching points. This corresponds to the *ex vivo*  
332 observations of the location of regions of damage in the ventral aorta of qKO zebrafish  
333 (**Error! Reference source not found.**).

334 ***qKO zebrafish show skeletal aberrations, but largely normal swimming***  
335 ***behavior***

336 The qKO show an increased presence of ectopic bone formation ( $p = 0.0014$ ). Scoliosis,  
337 hyperlordosis and hyperkyphosis, bending of the arches and ribs, as well as  
338 intervertebral ligament mineralization and notochord mineralization are apparent in the  
339 qKO zebrafish only (**Figure , Error! Reference source not found.**).

340 In qKO zebrafish, the nasal region of the skull is underdeveloped with a significantly  
341 reduced distance between the tip of the snout and tip of the frontal bone ( $p < 0.0001$ ).

342 **(Figure , Error! Reference source not found.)**. Interestingly, qKO show normal values  
343 for the normalized surface area of the cranial roof in contrast to the *smad3a/b* DKO,  
344 which was significantly decreased ( $p = 0.0101$ ) **(Supplementary Fig. 8)**. Since qKO  
345 embryos show a tortuous hypobranchial artery, which provides blood flow to the teeth,  
346 tooth morphology was evaluated, but appears normal **(Error! Reference source not**  
347 **found.)**.

348 At 9 mpf, qKO zebrafish show a decrease in movement frequency ( $p = 0.0197$ ), but not  
349 in normalized total distance traveled compared to WT zebrafish **(Error! Reference**  
350 **source not found.)**.

### 351 ***Bulk RNA sequencing of 5 dpf qKO shows a reduction in the negative*** 352 ***regulation of proteolysis and upregulation of melanogenesis***

353 Bulk RNA sequencing in 5 dpf qKO and 2<sup>nd</sup> degree related WT control zebrafish  
354 identified 1131 differentially expressed genes (DEG) (adjusted p-value <0.05)  
355 **(Supplementary Table 4)**. The top 10 enriched GO-terms in the upregulated gene set  
356 mostly involve pigmentation (pigment metabolic process, pigment biosynthetic process,  
357 melanosome organization, pigment granule organization, melanocyte differentiation,  
358 pigmentation, developmental pigmentation). One of the central DEG driving this  
359 enrichment is the *mitfa* transcription factor, which is known to signal downstream of  
360 BMP and governs melanocyte differentiation and development via tyrosinase (log FC *tyr*  
361 2.01), tyrosinase related protein 1 (log FC *tyrp1a* 1.82 and log FC *tyrp1b* 2.08), the  
362 premelanosome protein (log FC *pmela* 1.44 and log FC *pmelb* 3.66), dopachrome  
363 tautomerase (log FC *dct* 2.6), and the melanosomal transporter (log FC *slc24a5*  
364 2.35)<sup>49,50</sup>. The top 10 enriched GO-terms in the downregulated gene set are linked to

365 negative regulation of proteolysis (negative regulation peptidase activity, negative  
366 regulation proteolysis, regulation of peptidase activity, negative regulation of  
367 endopeptidase activity, regulation of proteolysis) and immune response (regulation of  
368 immune response, positive regulation of immune system process) (**Supplementary**  
369 **Table 5-6**). A heatmap with stringent thresholds ( $p_{\text{adjust}} \geq 0.0001$  and  $|\log_2\text{FC}| \geq 1$ )  
370 and a volcano plot are shown in **Figure** . Annotated dysregulated genes with a known  
371 role in aortic wall homeostasis, include *lox13a*, *emilin3a* and *fnb2b* (elastic fiber  
372 assembly), *vcana* and *lamc2* (vascular cell adhesion glycoproteins), *mhc1uma* (a  
373 zebrafish specific MHC class I gene), and *uts2a* (a vasoconstrictor linked to  
374 hypertension and heart failure in humans). Dysregulation of *omd* (a transcription factor,  
375 activated via BMP signaling, that links to cell adhesion and bone mineralization) might  
376 relate to the observed bone phenotypes.

### 377 ***Tyrosinase inhibition increases diameter of the ventral aorta in 10 dpf*** 378 ***zebrafish***

379 To investigate the involvement of melanogenesis-related pathways in aortic  
380 development, we administered 0.003% PTU, a known inhibitor of tyrosinase in the  
381 medium of WT zebrafish embryos starting at 1 dpf. At 10 dpf, treated zebrafish show a  
382 significant increase of normalized ventral aortic surface area ( $p = 0.0066$ ) and mean  
383 normalized aorta diameter between aortic arch 3 and 4 ( $p = 0.0065$ ) compared to  
384 vehicle control. Length of the aortic segment and diameter adjacent to the bulbus  
385 arteriosus remained unchanged compared to non-treated sibling controls (**Figure** ).



## 386 DISCUSSION

387 TGF $\beta$  and BMP signaling show significant crosstalk during vascular and skeletal  
388 development and homeostasis. Our results support the existence of modifier effects  
389 particularly on aortic phenotypes associated with *SMAD6*-deficiency, which range from  
390 bicuspid aortic valve with or without ascending aortic dilatation to Shone complex with a  
391 hypoplastic ascending aorta and aortic arch.

392 In the genome of mammals and teleost fish, *SMAD3* and *SMAD6* locate closely  
393 together, but in different topologically associated domains<sup>16</sup>. Since zebrafish express  
394 *smad3a*, *smad3b*, *smad6a* and *smad6b*<sup>51-54</sup>, this model provides flexibility to investigate  
395 the interactions between these genes upon gene dosage. Although maternal *smad3a* is  
396 required during early embryogenesis, which is supported by previous findings<sup>48</sup>, SKO  
397 show no obvious vascular or skeletal phenotype, except for mild craniofacial alterations  
398 in *smad3a*<sup>-/-</sup> zebrafish. However, *smad3a/b* or *smad6a/b* DKO do manifest  
399 cardiovascular and mild skeletal phenotypes, supporting compensation between the  
400 ohnologs of either *smad3* or *smad6*, in line with their strongly conserved protein  
401 structure<sup>19</sup>.

402 *Smad6a/b* and *smad3a/b* DKO show opposite vascular phenotypes. *Smad3a/b* DKO  
403 zebrafish show an increase in aortic diameter in early larval stages. This aligns with  
404 previous findings in which loss of *alk5*<sup>-/-</sup>, the type 1 TGF- $\beta$  receptor which activates  
405 SMAD3, leads to an increased diameter of the cardiac outflow tract in zebrafish  
406 embryos, followed by a failed development of the ventral aorta causing death at 7 dpf<sup>55</sup>.  
407 It is plausible that in *smad3a/b* DKO limited amounts of Smad2/Smad4 complexes  
408 partially rescue the phenotype preventing early death and an adult cardiovascular

409 phenotype, in contrast to *Alk5* loss of function, in which both *Smad2* and *Smad3* will not  
410 be activated<sup>56</sup>.

411 *Smad6a/b* DKO show a reduced aortic diameter, and early death. The qKO also shows  
412 a reduction of the aortic diameter and arterial tortuosity, but survives to adulthood. The  
413 observation that the *smad3a*<sup>+/-</sup>;*smad3b*<sup>-/-</sup>;*smad6a*<sup>+/-</sup>;*smad6b*<sup>-/-</sup> shows a more severe  
414 reduction in aortic diameter than the qKO might be explained by the exclusion of the  
415 most affected qKO embryos, since clear edge detection of the ventral aorta in these  
416 embryos is hindered due to excessive tortuosity. Hence, it seems reasonable to  
417 generalize that *smad3* loss of function increases, while lack of *smad6* decreases the  
418 diameter of the aorta. The overall net result in the qKO shows a decreased diameter of  
419 the ventral aorta with asymmetrical branching and a high susceptibility for dissection  
420 and rupture in adult zebrafish. It has been previously reported that zebrafish *smad6b* is  
421 involved together with BMP in modulation of lateral sprouting of the dorsal aorta<sup>54</sup>.

422 Abnormal aortic branching results in altered hemodynamics and elevated systolic wall  
423 stress, as confirmed by our fluid-structure interaction models presented here. Areas  
424 exposed to perturbed local flow patterns prove prone to aortic wall damage and  
425 dissection, as demonstrated by histological and synchrotron imaging of the aorta. TEM  
426 analysis reveals a severe reduction of elastic fiber deposition in the inter-elastic  
427 laminae, which can be linked to a lessened resilience to hemodynamic stress.  
428 Additionally, abnormal collagen deposition near the intima of qKO zebrafish recapitulate  
429 increased collagen deposition in human TAAD<sup>57</sup>, indicating that similar  
430 pathophysiological processes are activated in our zebrafish model. The presence of an  
431 atrioventricular and bulboventricular valve defect in the qKO is in line with the role of



432 SMAD6 in human bicuspid aortic valve disease<sup>58</sup>. It is conceivable that unopposed loss  
433 of both *smad6* ohnologs in zebrafish leads to a failure to maintain aortic homeostasis or  
434 to severe valve dysfunction, resulting in the premature death observed in the *smad6a/b*  
435 DKO late juvenile zebrafish.

436 The spectrum of bone phenotypes observed in the different genotypes confirms the  
437 modulatory interactions between the different *smad* genes. Indeed, *smad3a/b* DKO, but  
438 not *smad3a<sup>+/-</sup>;smad3b<sup>-/-</sup>* or *smad3a<sup>-/-</sup>;smad3b<sup>+/-</sup>* zebrafish, show increased ectopic bone  
439 formation, a decreased normalized cranial roof surface area, and vertebral column axis  
440 deviations. In contrast, the *smad6a<sup>+/-</sup>;smad6b<sup>-/-</sup>* and the *smad6a<sup>-/-</sup>;smad6b<sup>+/-</sup>* zebrafish  
441 do show an increase in ectopic bone formation, although it needs to be highlighted that  
442 adult *smad6a/b* DKO cannot be studied since they do not survive until adulthood. The  
443 qKO zebrafish show more ectopic bone formation, and more severe column axis  
444 deviations. These observations suggest a larger impact of BMP signaling on skeletal  
445 development, that is further impacted by loss of TGFβ signaling.

446 Enrichment analysis of bulk RNA sequencing data of qKO embryos at 5 dpf revealed  
447 upregulation of multiple pathways related to pigmentation, including the central  
448 transcription factor *mitfa* as well as downstream effectors in melanin production such as  
449 *tyrp1a*, *tyrp1b*, *tyr* and *dct*. MITF is a known downstream target of BMP signaling that is  
450 inhibited by SMAD6<sup>59-61</sup>. MITF also acts upstream of lysosome biogenesis and it was  
451 previously shown that lysosomal dysfunction in zebrafish due to loss of function of  
452 *atp6v1e1b* associates with dilatation of the ventral aorta and narrow aortic branches<sup>28</sup>.  
453 Finally, MITF is known to be important for cell metabolism and cell cycle regulation,  
454 promoting mitochondrial biogenesis and having complex effects on proliferation

455 depending on the level of MITF activity<sup>62</sup>. It is conceivable that one or more of these  
456 effects of MITF are linked to the development of the phenotype observed in our qKO  
457 model.

458 The transcriptional changes of pigmentation-related pathways in the qKO model  
459 prompted us to test the consequences of pharmacological inhibition of tyrosinase, a key  
460 enzyme responsible for eumelanin production, at a dose commonly used in zebrafish  
461 research to block pigment formation. Inhibition of tyrosinase via PTU treatment resulted  
462 in an increase of the aorta diameter while a decreased aortic diameter in qKO at 10 dpf  
463 is associated with upregulated tyrosinase expression. This strongly supports a role for  
464 the pigment biosynthesis pathway in aortic homeostasis. Therefore, the use of PTU for  
465 imaging purposes should be approached with caution due to the potential for  
466 unintended effects on other organ systems, especially when evaluating cardiovascular  
467 phenotypes. Undesired effects of PTU have been reported previously including  
468 autophagy activation<sup>63</sup>, activation of cytochrome P4501A1 (*cyp1a1*)<sup>64</sup>, suppression of  
469 retinol-binding protein 4 (*rbp4*)<sup>65</sup> and reduction of the diameter of the eye<sup>66</sup>.

470 Despite upregulation of melanin-producing pathways, no increase of skin pigmentation  
471 could be observed in the embryo or adult qKO zebrafish. Previous research showed  
472 that tyrosinase follows a specific spatiotemporal expression pattern during  
473 embryogenesis, which is not confined to skin cells<sup>67</sup>. At 7 dpf, small amounts of melanin  
474 can already be detected around the dorsal aorta, while at 1 month, melanin deposition  
475 is apparent<sup>68</sup>. It is therefore tempting to speculate that pigmentation-related pathways  
476 affect vascular development, particularly since it was recently shown that tyrosinase  
477 reduces expression of vascular endothelial growth factors<sup>69</sup>.

478 The relevance of the qKO model to study the disease mechanisms of dissection is  
479 further supported by the transcriptomic changes concordant with established models  
480 and known pathogenetic mechanisms of TAD. Altered elastic fiber homeostasis, which  
481 was confirmed in the qKO aortic wall using TEM, is reflected in upregulation of *Fbn2b*<sup>70</sup>  
482 (logFC 1.04), a fibrillin known to be involved in endocardial morphogenesis, which might  
483 be upregulated as a response to the coarctation in the qKO, and downregulation of  
484 *mfap4* (logFC -3.26), an important component of the extracellular matrix (ECM) involved  
485 in elastic fiber assembly. In zebrafish, MFAP4 also regulates the balance between  
486 myeloid and lymphoid development<sup>71</sup>. Another immune cell-related gene expressed  
487 differently in qKO zebrafish is *itgam* (LogFC -5.33), coding for a component of the  
488 heterodimeric  $\alpha_M\beta_2$  integrin expressed on leukocytes which is also known as  
489 macrophage-1 antigen (Mac-1) or CD11b. This protein plays a crucial role in binding to  
490 ECM components and intracellular adhesion molecules, involved in adhesion and  
491 transmigration of leukocytes across blood vessels. The qKO transcriptomic profile also  
492 indicates that matrix proteolysis is increased, due to downregulation of the  
493 metalloproteinase inhibitor *timp4* (LogFC -3.28), in combination with upregulation of  
494 *mmp11b* (logFC 1.34) and *mmp13a* (logFC 1.35). These targets are all widely  
495 established in the pathogenesis of vascular and bone homeostasis<sup>72-74</sup>. *Lox13a*, an  
496 orthologue of the human *LOXL3*<sup>75</sup> important for crosslinking of elastin and collagen, is  
497 significantly downregulated in qKO zebrafish. In mice, deletion of *Lox13* results in  
498 abnormal skeletal development and is expressed in the precursors of the occipital and  
499 interparietal bones and nasal area, affected in the qKO model<sup>76</sup>.

500 In conclusion, Smad3-deficiency modifies Smad6-deficient phenotypes whereby  
501 *smad3a*<sup>-/-</sup>;*smad3b*<sup>-/-</sup>;*smad6a*<sup>-/-</sup>;*smad6b*<sup>-/-</sup> qKO zebrafish model aortic dissection and  
502 rupture, resulting from defective vasculogenesis and resultant local wall stress. In  
503 addition to known signatures of TAAD in human and mouse models, this model  
504 implicates the pigmentation pathway in the development of the aortic phenotypes.  
505 Follow-up studies on the precise contribution of these pathways are warranted and are  
506 likely to lead to novel targets for therapeutic intervention in TAAD.

## 507 **ACKNOWLEDGMENTS**

508 The authors thank the family for their participation in this research. We also would like to  
509 thank the Zebrafish Facility Ghent Core at Ghent University, and particularly Karen  
510 Vermeulen for the diligent care for the zebrafish. We acknowledge the Paul Scherrer  
511 Institut (PSI), Villigen, Switzerland for provision of synchrotron radiation beamtime at the  
512 TOMCAT beamline X02DA of the Swiss Light Source, and would like to thank Karo De  
513 Rycke, Violette Deleeuw, Marina Horvat, Yousof Mohammad Asaad Abdel-Raouf  
514 (Ghent University) and Isaac Rodriguez Rovira (University of Barcelona) for their  
515 assistance in acquiring the synchrotron imaging data. Finally, we would like to thank the  
516 Nematology Research Unit, member of the UGent TEM Core Facility and the  
517 sequencing core of UZ Ghent.

## 518 **SOURCES OF FUNDING**

519 This work was supported by a Concerted Research Action grant from the Ghent  
520 University Special Research Fund (grant number BOF GOA019-21) to BC and PS, A  
521 research project of the Research Foundation – Flanders (grant number G0B4920N) and  
522 the Marfan Foundation Innovators Grant Program (grant number  
523 INT.DIV.2023.0008.01) to BC. Bert Callewaert is a senior clinical investigator of the  
524 Research Foundation-Flanders.

## 525 **DISCLOSURES**

526 None

## 527 **DATA AVAILABILITY**

528 Raw RNAseq data is available at Gene Expression Omnibus with accession number  
529 GSE249792. To review GEO accession GSE249792. For reviewers, following link is  
530 available to access the data.

531 <https://eur03.safelinks.protection.outlook.com/?url=https%3A%2F%2Fwww.ncbi.nlm.nih.gov%2Fgeo%2Fquery%2Facc.cgi%3Facc%3DGSE249792&data=05%7C02%7Cmichiel.vanhooydonck%40ugent.be%7Cbeba6c62b40641ced96408dbfa282a45%7Cd7811cdeecef496c8f91a1786241b99c%7C1%7C0%7C638378822642521272%7CUnknown%7CTWFpbGZsb3d8eyJWIjoiMC4wLjAwMDAiLCJQIjoiV2luMzliLCJBTiI6IjEhaWwiLCJXVCIl6Mn0%3D%7C3000%7C%7C%7C&sdata=7g1JeMJOvj4IZVmQ6FVdkN%2FA2zrRUcuVlw6Hcear5vs%3D&reserved=0>

538 Enter token obmhwiqkbbSprkt into the box.

539 All other data will be made available upon request.

540

## 541 **AUTHOR CONTRIBUTIONS**

542 Conceptualization: MVH., PSI., BC. Methodology: MVH., MVE., MSS., LP., AKB., DS.,  
543 PSI., BC. Software: MSS., MVI. Formal analysis: MVH., MSV., MVI., DS. Investigation:  
544 MVH., MVE., MVI., MSS., LP., AKB., HDS., LC., PT., DS. Resources: PSI., BC. Data  
545 Curation: MVH., MSS. Writing (original draft): MVH., MVE. Writing (review & editing):  
546 MVH., MVE., MSS., LP., AKB, MVI., HDS., LC., PT., AB., P.SE., ADC., AW., DS., PSI.,  
547 BC. Visualization: MVH. MVE. Supervision: PSI., BC. Funding acquisition: PSI., BC.

548

## 549 **SUPPLEMENTARY MATERIAL**

550 Supplementary Case Presentation

- 551 Supplementary Methods
- 552 Supplementary References
- 553 Supplementary Figures 1 - 17
- 554 Supplementary Tables 1 - 7
- 555 Supplementary Movies 1 - 19

## 556 REFERENCES

- 557 1. Lemaire SA, Russell L. Epidemiology of thoracic aortic dissection. *Nature*  
558 *reviews. Cardiology*. 2011;8(2):103–113.
- 559 2. Van De Laar IMBH, Oldenburg RA, Pals G, Roos-Hesselink JW, De Graaf  
560 BM, Verhagen JMA, Hoedemaekers YM, Willemsen R, Severijnen LA, Venselaar  
561 H, Vriend G, Pattynama PM, Collée M, Majoor-Krakauer D, Poldermans D, et al.  
562 Mutations in SMAD3 cause a syndromic form of aortic aneurysms and dissections  
563 with early-onset osteoarthritis. *Nature Genetics*. 2011;43(2):121–126.
- 564 3. Deleeuw V, Carlson E, Renard M, Zientek KD, Wilmarth PA, Reddy AP,  
565 Manalo EC, Tufa SF, Keene DR, Olbinado M, Stampanoni M, Kanki S,  
566 Yanagisawa H, Mosquera LM, Sips P, et al. Unraveling the role of TGF $\beta$  signaling  
567 in thoracic aortic aneurysm and dissection using Fbn1 mutant mouse models.  
568 *Matrix biology : journal of the International Society for Matrix Biology*.  
569 2023;123:17–33.
- 570 4. Doyle JJ, Gerber EE, Dietz HC. Matrix-dependent perturbation of TGF $\beta$   
571 signaling and disease. *FEBS Letters*. 2012;586(14):2003–2015.
- 572 5. Li W, Li Q, Jiao Y, Qin L, Ali R, Zhou J, Ferruzzi J, Kim RW, Geirsson A,  
573 Dietz HC, Offermanns S, Humphrey JD, Tellides G. Tgfbr2 disruption in postnatal  
574 smooth muscle impairs aortic wall homeostasis. *The Journal of Clinical*  
575 *Investigation*. 2014;124(2):755–767.
- 576 6. Bellini C, Bersi MR, Caulk AW, Ferruzzi J, Milewicz DM, Ramirez F, Rifkin  
577 DB, Tellides G, Yanagisawa H, Humphrey JD. Comparison of 10 murine models  
578 reveals a distinct biomechanical phenotype in thoracic aortic aneurysms. *Journal*  
579 *of the Royal Society Interface*. 2017;14(130):20161036.
- 580 7. Schmierer B, Hill CS. TGFbeta-SMAD signal transduction: molecular  
581 specificity and functional flexibility. *Nature reviews. Molecular cell biology*.  
582 2007;8(12):970–982.
- 583 8. Miyazawa K, Miyazono K. Regulation of TGF- $\beta$  Family Signaling by  
584 Inhibitory Smads. *Cold Spring Harbor perspectives in biology*.  
585 2017;9(3)::a022095.
- 586 9. Liu Y, Festing M, Thompson JC, Hester M, Rankin S, El-Hodiri HM, Zorn  
587 AM, Weinstein M. Smad2 and Smad3 coordinately regulate craniofacial and  
588 endodermal development. *Developmental Biology*. 2004;270(2):411–426.
- 589 10. Timberlake AT, Choi J, Zaidi S, Lu Q, Nelson-Williams C, Brooks ED,  
590 Bilguvar K, Tikhonova I, Mane S, Yang JF, Sawh-Martinez R, Persing S, Zellner  
591 EG, Loring E, Chuang C, et al. Two locus inheritance of non-syndromic midline



- 592           cranosynostosis via rare SMAD6 and common BMP2 alleles. *eLife*.  
593           2016;5(September2016):e20125.
- 594           11.     Yang Y, Zheng Y, Li W, Li L, Tu M, Zhao L, Mei H, Zhu G, Zhu Y. SMAD6  
595           is frequently mutated in nonsyndromic radioulnar synostosis. *Genetics in*  
596           *medicine : official journal of the American College of Medical Genetics*.  
597           2019;21(11):2577–2585.
- 598           12.     Tan HL, Glen E, Töpf A, Hall D, O’Sullivan JJ, Sneddon L, Wren C, Avery  
599           P, Lewis RJ, ten Dijke P, Arthur HM, Goodship JA, Keavney BD. Nonsynonymous  
600           variants in the SMAD6 gene predispose to congenital cardiovascular  
601           malformation. *Human Mutation*. 2012;33(4):720–727.
- 602           13.     Luyckx I, MacCarrick G, Kempers M, Meester J, Geryl C, Rombouts O,  
603           Peeters N, Claes C, Boeckx N, Sakalihan N, Jacquinet A, Hoischen A,  
604           Vandeweyer G, Van Lent S, Saenen J, et al. Confirmation of the role of  
605           pathogenic SMAD6 variants in bicuspid aortic valve-related aortopathy. *European*  
606           *Journal of Human Genetics*. 2019;27(7):1044–1053.
- 607           14.     Luyckx I, Verstraeten A, Goumans MJ, Loeys B. SMAD6-deficiency in  
608           human genetic disorders. *NPJ Genomic Medicine*. 2022;7(1):68.
- 609           15.     Kloth K, Bierhals T, Johannsen J, Harms FL, Juusola J, Johnson MC,  
610           Grange DK, Kutsche K. Biallelic variants in SMAD6 are associated with a complex  
611           cardiovascular phenotype. *Human genetics*. 2019;138(6):625–634.
- 612           16.     Rajderkar S, Barozzi I, Zhu Y, Hu R, Zhang Y, Li B, Alcaina Caro A,  
613           Fukuda-Yuzawa Y, Kelman G, Akeza A, Blow MJ, Pham Q, Harrington AN,  
614           Godoy J, Meky EM, et al. Topologically associating domain boundaries are  
615           required for normal genome function. *Communications Biology*. 2023;6:435.
- 616           17.     Giehl KA, Eckstein GN, Pasternack SM, Praetzel-Wunder S, Ruzicka T,  
617           Lichtner P, Seidl K, Rogers M, Graf E, Langbein L, Braun-Falco M, Betz RC,  
618           Strom TM. Nonsense mutations in AAGAB cause punctate palmoplantar  
619           keratoderma type Buschke-Fischer-Brauer. *American journal of human genetics*.  
620           2012;91(4):754–759.
- 621           18.     Glasauer SMK, Neuhauss SCF. Whole-genome duplication in teleost  
622           fishes and its evolutionary consequences. *Molecular genetics and genomics :*  
623           *MGG*. 2014;289(6):1045–1060.
- 624           19.     Pearson WR. An Introduction to Sequence Similarity (“Homology”)  
625           Searching. *Current protocols in bioinformatics*. 2013;chapter 3:3.1.1-3.1.8.
- 626           20.     Jia S, Ren Z, Li X, Zheng Y, Meng A. smad2 and smad3 Are Required for  
627           Mesendoderm Induction by Transforming Growth Factor-/Nodal Signals in  
628           Zebrafish. *Journal of Biological Chemistry*. 2008;283(4):2418–2426.

- 629 21. Casari A, Schiavone M, Facchinello N, Vettori A, Meyer D, Tiso N, Moro  
630 E, Argenton F. A Smad3 transgenic reporter reveals TGF-beta control of zebrafish  
631 spinal cord development. *Developmental biology*. 2014;396(1):81–93.
- 632 22. Pogoda HM, Meyer D. Zebrafish smad7 is regulated by Smad3 and BMP  
633 signals. *Developmental Dynamics*. 2002;224(3):334–349.
- 634 23. Lawrence C, Sanders GE, Varga ZM, Baumann DP, Freeman A, Baur B,  
635 Francis M. Regulatory compliance and the Zebrafish. *Zebrafish*. 2009;6(4):453–  
636 456.
- 637 24. Westerfield M, Doerry E, Kirkpatrick AE, Douglas SA. Chapter 19  
638 Zebrafish Informatics and the ZFIN Database. *Methods in Cell Biology*.  
639 1998;60(C):339–355.
- 640 25. Naito Y, Hino K, Bono H, Ui-Tei K. CRISPRdirect: software for designing  
641 CRISPR/Cas guide RNA with reduced off-target sites. *Bioinformatics*.  
642 2015;31(7):1120.
- 643 26. Boel A, De Saffel H, Steyaert W, Callewaert B, De Paepe A, Coucke PJ,  
644 Willaert A. CRISPR/Cas9-mediated homology-directed repair by ssODNs in  
645 zebrafish induces complex mutational patterns resulting from genomic integration  
646 of repair-template fragments. *DMM Disease Models and Mechanisms*.  
647 2018;11(10):dmm035352.
- 648 27. Boel A, Steyaert W, De Rocker N, Menten B, Callewaert B, De Paepe A,  
649 Coucke P, Willaert A. BATCH-GE: Batch analysis of Next-Generation Sequencing  
650 data for genome editing assessment. *Scientific Reports*. 2016;6(July):30330.
- 651 28. Pottie L, van Gool W, Vanhooydonck M, Hanisch FG, Goeminne, Rajkovic  
652 A, Coucke P, Sips P, Callewaert B. Loss of zebrafish atp6v1e1b, encoding a  
653 subunit of vacuolar ATPase, recapitulates human ARCL type 2C syndrome and  
654 identifies multiple pathobiological signatures. *PLoS genetics*.  
655 2021;17(6):e1009603.
- 656 29. Saalfeld S, Cardona A, Hartenstein V, Tomančák P. As-rigid-as-possible  
657 mosaicking and serial section registration of large ssTEM datasets.  
658 *Bioinformatics*. 2010;26(12):i57–i63.
- 659 30. Saalfeld S, Fetter R, Cardona A, Tomancak P. Elastic volume  
660 reconstruction from series of ultra-thin microscopy sections. *Nature methods*.  
661 2012;9(7):717–720.
- 662 31. Cardona A, Saalfeld S, Schindelin J, Arganda-Carreras I, Preibisch S,  
663 Longair M, Tomancak P, Hartenstein V, Douglas RJ. TrakEM2 software for neural  
664 circuit reconstruction. *PloS one*. 2012;7(6):e38011.

- 665 32. Van Impe M, Caboor L, Deleeuw V, Rycke K De, Vanhooydonck M,  
666 Backer J De, Segers P, Sips P. Application of an automated analysis framework  
667 for pulsed-wave Doppler cardiac ultrasound measurements to generate reference  
668 data in adult zebrafish. *American Journal of Physiology*. 2023;325(6):R782–R796.
- 669 33. Ramsay JM, Feist GW, Varga ZM, Westerfield M, Kent ML, Schreck CB.  
670 Whole-body cortisol response of zebrafish to acute net handling stress.  
671 *Aquaculture*. 2009;297(1–4):157–162.
- 672 34. Jarayseh T, Guillemin B, De Saffel H, Bek JW, Syx D, Symoens S,  
673 Gansemans Y, Van Nieuwerburgh F, Jagadeesh S, Raja J, Malfait F, Coucke PJ,  
674 De Clercq A, Willaert A. A tapt1 knock-out zebrafish line with aberrant lens  
675 development and impaired vision models human early-onset cataract. *Human*  
676 *Genetics*. 2023;142(3):457–476.
- 677 35. Bird NC, Mabee PM. Developmental morphology of the axial skeleton of  
678 the zebrafish, *Danio rerio* (Ostariophysi: Cyprinidae). *Developmental Dynamics*.  
679 2003;228(3):337–357.
- 680 36. Parichy DM, Elizondo MR, Mills MG, Gordon TN, Engeszer RE. Normal  
681 table of postembryonic zebrafish development: Staging by externally visible  
682 anatomy of the living fish. *Developmental Dynamics*. 2009;238(12):2975–3015.
- 683 37. Andrews S. Babraham Bioinformatics - FastQC A Quality Control tool for  
684 High Throughput Sequence Data. *FastQC A Quality Control tool for High*  
685 *Throughput Sequence Data*. 2010.
- 686 38. Krueger F, James F, Ewels P, Afyounian E, Schuster-Boeckler B.  
687 FelixKrueger/TrimGalore: v0.6.7 - DOI via Zenodo. 2021.
- 688 39. Dobin A, Davis CA, Schlesinger F, Drenkow J, Zaleski C, Jha S, Batut P,  
689 Chaisson M, Gingeras TR. STAR: ultrafast universal RNA-seq aligner.  
690 *Bioinformatics*. 2013;29(1):15–21.
- 691 40. Sayols S, Scherzinger D, Klein H. dupRadar: a Bioconductor package for  
692 the assessment of PCR artifacts in RNA-Seq data. *BMC bioinformatics*.  
693 2016;17(1):428.
- 694 41. Ewels P, Magnusson M, Lundin S, Käller M. MultiQC: summarize analysis  
695 results for multiple tools and samples in a single report. *Bioinformatics*.  
696 2016;32(19):3047–3048.
- 697 42. Liao Y, Smyth GK, Shi W. featureCounts: an efficient general purpose  
698 program for assigning sequence reads to genomic features. *Bioinformatics*.  
699 2014;30(7):923–930.

- 700 43. Robinson MD, McCarthy DJ, Smyth GK. edgeR: a Bioconductor package  
701 for differential expression analysis of digital gene expression data. *Bioinformatics*  
702 (*Oxford, England*). 2010;26(1):139–140.
- 703 44. Chen Y, Lun ATL, Smyth GK. From reads to genes to pathways:  
704 Differential expression analysis of RNA-Seq experiments using Rsubread and the  
705 edgeR quasi-likelihood pipeline. *F1000Research*. 2016;5.
- 706 45. Yu G, Wang LG, Han Y, He QY. clusterProfiler: an R package for  
707 comparing biological themes among gene clusters. *Omics : a journal of integrative*  
708 *biology*. 2012;16(5):284–287.
- 709 46. Van Impe M, Caboor L, Deleeuw V, Olbinado M, De Backer J, Sips P,  
710 Segers P. Fluid-Structure Interaction Modeling of the Aortic Hemodynamics in  
711 Adult Zebrafish: a Pilot Study based on Synchrotron X-Ray Tomography. *IEEE*  
712 *Transactions on Biomedical Engineering*. 2023;70(7):2101–2110.
- 713 47. Paganin D, Mayo SC, Gureyev TE, Miller PR, Wilkins SW. Simultaneous  
714 phase and amplitude extraction from a single defocused image of a  
715 homogeneous object. *Journal of Microscopy*. 2002;206(1):33–40.
- 716 48. Marone F, Stampanoni M. Regridding reconstruction algorithm for real-  
717 time tomographic imaging. *Journal of synchrotron radiation*. 2012;19(Pt 6):1029–  
718 1037.
- 719 49. Hsiao JJ, Fisher DE. The roles of microphthalmia-associated transcription  
720 factor and pigmentation in melanoma. *Archives of Biochemistry and Biophysics*.  
721 2014;563:28–34.
- 722 50. Bian C, Li R, Wen Z, Ge W, Shi Q. Phylogenetic Analysis of Core Melanin  
723 Synthesis Genes Provides Novel Insights Into the Molecular Basis of Albinism in  
724 Fish. *Frontiers in Genetics*. 2021;12:707228.
- 725 51. Casari A, Schiavone M, Facchinello N, Vettori A, Meyer D, Tiso N, Moro  
726 E, Argenton F. A Smad3 transgenic reporter reveals TGF-beta control of zebrafish  
727 spinal cord development. *Developmental Biology*. 2014;396(1):81–93.
- 728 52. Pogoda HM, Meyer D. Zebrafish smad7 is regulated by Smad3 and BMP  
729 signals. *Developmental Dynamics*. 2002;224(3):334–349.
- 730 53. De Pater E, Ciampricotti M, Priller F, Veerkamp J, Strate I, Smith K,  
731 Lagendijk AK, Schilling TF, Herzog W, Abdelilah-Seyfried S, Hammerschmidt M,  
732 Bakkens J. Bmp signaling exerts opposite effects on cardiac differentiation.  
733 *Circulation Research*. 2012;110(4):578–587.
- 734 54. Mouillesseaux KP, Wiley DS, Saunders LM, Wylie LA, Kushner EJ, Chong  
735 DC, Citrin KM, Barber AT, Park Y, Kim JD, Samsa LA, Kim J, Liu J, Jin SW,

- 736 Bautch VL. Notch regulates BMP responsiveness and lateral branching in vessel  
737 networks via SMAD6. *Nature Communications*. 2016;7:13247.
- 738 55. Boezio GLM, Bensimon-Brito A, Piesker J, Guenther S, Helker CSM,  
739 Stainier DYR. Endothelial TGF- $\beta$  signaling instructs smooth muscle cell  
740 development in the cardiac outflow tract. *eLife*. 2020;9:1–32.
- 741 56. Lucarelli P, Schilling M, Kreutz C, Vlasov A, Boehm ME, Iwamoto N,  
742 Steiert B, Lattermann S, Wäsch M, Stepath M, Matter MS, Heikenwälder M,  
743 Hoffmann K, Deharde D, Damm G, et al. Resolving the Combinatorial Complexity  
744 of Smad Protein Complex Formation and Its Link to Gene Expression. *Cell*  
745 *Systems*. 2018;6(1):75-89.e11.
- 746 57. Wang X, LeMaire SA, Chen L, Shen YH, Gan Y, Bartsch H, Carter SA,  
747 Utama B, Ou H, Coselli JS, Wang XL. Increased Collagen Deposition and  
748 Elevated Expression of Connective Tissue Growth Factor in Human Thoracic  
749 Aortic Dissection. *Circulation*. 2006;114(SUPPL. 1):I200–I205.
- 750 58. Bechtel JFM, Misfeld M, Schmidtke C, Sievers HH. The bicuspid aortic  
751 valve. In: *Aortic Root Surgery*.; 2010:89–101.
- 752 59. Yang J, Wang J, Pan L, Li H, Rao C, Zhang X, Niu G, Qu J, Hou L. BMP4  
753 is required for the initial expression of MITF in melanocyte precursor  
754 differentiation from embryonic stem cells. *Experimental cell research*.  
755 2014;320(1):54–61.
- 756 60. Massaous J, Hata A. TGF-B signalling through the Smad pathway. *Cell*  
757 *Biology*. 1997;7:187–192.
- 758 61. Steinfeld J, Steinfeld I, Coronato N, Hampel ML, Layer PG, Araki M,  
759 Vogel-Höpker A. RPE specification in the chick is mediated by surface ectoderm-  
760 derived BMP and Wnt signalling. *Development*. 2013;140(24):4959–4969.
- 761 62. Goding CR, Arnheiter H. Mitf—the first 25 years. *Genes and*  
762 *Development*. 2019;33(15–16):983–1007.
- 763 63. Chen XK, Kwan JSK, Chang RCC, Ma ACH. 1-phenyl 2-thiourea (PTU)  
764 activates autophagy in zebrafish embryos. *Autophagy*. 2021;17(5):1222–1231.
- 765 64. Wang W Der, Wang Y, Wen HJ, Buhler DR, Hu CH. Phenylthiourea as a  
766 weak activator of aryl hydrocarbon receptor inhibiting 2,3,7,8-tetrachlorodibenzo-  
767 p-dioxin-induced CYP1A1 transcription in zebrafish embryo. *Biochemical*  
768 *Pharmacology*. 2004;68(1):63–71.
- 769 65. Tingaud-Sequeira A, Forgue J, André M, Babin PJ. Epidermal transient  
770 down-regulation of retinol-binding protein 4 and mirror expression of  
771 apolipoprotein Eb and estrogen receptor 2a during zebrafish fin and scale  
772 development. *Developmental Dynamics*. 2006;235(11):3071–3079.



- 773 66. Li Z, Ptak D, Zhang L, Walls EK, Zhong W, Leung YF. Phenylthiourea  
774 Specifically Reduces Zebrafish Eye Size. *PLOS ONE*. 2012;7(6):e40132.
- 775 67. Camp E, Lardelli M. Tyrosinase gene expression in zebrafish embryos.  
776 *Development genes and evolution*. 2001;211(3):150–153.
- 777 68. Miano JM, Georger MA, Rich A, De Mesy Bentley KL. Ultrastructure of  
778 zebrafish dorsal aortic cells. *Zebrafish*. 2006;3(4):455–463.
- 779 69. Clahsen T, Hatami N, Büttner C, Reis A, Cursiefen C. Tyrosinase reduces  
780 expression of vascular endothelial growth factors and improves corneal graft  
781 survival. *Investigative Ophthalmology & Visual Science*. 2022;63(7):909-A0273.
- 782 70. Mellman K, Huisken J, Dinsmore C, Hoppe C, Stainier DY. Fibrillin-2b  
783 regulates endocardial morphogenesis in zebrafish. *Developmental biology*.  
784 2012;372(1):111–119.
- 785 71. Ong SLM, De Vos IJHM, Meroshini M, Poobalan Y, Dunn & NR.  
786 Microfibril-associated glycoprotein 4 (Mfap4) regulates haematopoiesis in  
787 zebrafish. 2020;10:11801.
- 788 72. Koskivirta I, Rahkonen O, Mäyränpää M, Pakkanen S, Husheem M, Sainio  
789 A, Hakovirta H, Laine J, Jokinen E, Vuorio E, Kovanen P, Järveläinen H. Tissue  
790 inhibitor of metalloproteinases 4 (TIMP4) is involved in inflammatory processes of  
791 human cardiovascular pathology. *Histochemistry and cell biology*.  
792 2006;126(3):335–342.
- 793 73. Johansson N, Ahonen M, Kähäri VM. Matrix metalloproteinases in tumor  
794 invasion. *Cellular and Molecular Life Sciences*. 2000;10(6):415–433.
- 795 74. Jones JA, Ikonomidis JS. The Pathogenesis of Aortopathy in Marfan  
796 Syndrome and Related Diseases. *Current cardiology reports*. 2010;12(2):99–107.
- 797 75. Van Boxtel AL, Gansner JM, Hakvoort HWJ, Snell H, Legler J, Gitlin JD.  
798 Lysyl oxidase-like 3b is Critical for Cartilage Maturation During Zebrafish  
799 Craniofacial Development. *Matrix biology : journal of the International Society for*  
800 *Matrix Biology*. 2011;30(2001):178–187.
- 801 76. Santamaría PG, Dubus P, Bustos-tauler J, Floristán A, Vázquez-naharro  
802 A, Morales S, Cano A, Portillo F. Loxl2 and Loxl3 Paralogues Play Redundant  
803 Roles during Mouse Development. *International Journal of Molecular Sciences*.  
804 2022;23(10):5730.
- 805
- 806

## 807 **FIGURES WITH FIGURE LEGENDS**

808 Links with access to high quality figures and the supplementary movies. Lower quality

809 figures can be found below:

|                         |                                                                                                       |
|-------------------------|-------------------------------------------------------------------------------------------------------|
| Figure 1                | <a href="https://figshare.com/s/58540e31ae5dcfed3750">https://figshare.com/s/58540e31ae5dcfed3750</a> |
| Figure 2                | <a href="https://figshare.com/s/b08f40d0b6c136b31ee4">https://figshare.com/s/b08f40d0b6c136b31ee4</a> |
| Figure 3                | <a href="https://figshare.com/s/9fbc19810756ed1b34b4">https://figshare.com/s/9fbc19810756ed1b34b4</a> |
| Figure 4                | <a href="https://figshare.com/s/07b6703f58ea0653336e">https://figshare.com/s/07b6703f58ea0653336e</a> |
| Figure 5                | <a href="https://figshare.com/s/2b913da4b07559cc0607">https://figshare.com/s/2b913da4b07559cc0607</a> |
| Figure 6                | <a href="https://figshare.com/s/42bdead6d4b916ec7327">https://figshare.com/s/42bdead6d4b916ec7327</a> |
| Supplementary Figure 1  | <a href="https://figshare.com/s/1d96715da2007c11ae96">https://figshare.com/s/1d96715da2007c11ae96</a> |
| Supplementary Figure 2  | <a href="https://figshare.com/s/7117068f173e59e3b7e7">https://figshare.com/s/7117068f173e59e3b7e7</a> |
| Supplementary Figure 3  | <a href="https://figshare.com/s/8a7ce09585ca754dedd1">https://figshare.com/s/8a7ce09585ca754dedd1</a> |
| Supplementary Figure 4  | <a href="https://figshare.com/s/e754b6c96ea2c0588a15">https://figshare.com/s/e754b6c96ea2c0588a15</a> |
| Supplementary Figure 5  | <a href="https://figshare.com/s/c902712aae5ffea8e862">https://figshare.com/s/c902712aae5ffea8e862</a> |
| Supplementary Figure 6  | <a href="https://figshare.com/s/9bcafde922edd89090ad">https://figshare.com/s/9bcafde922edd89090ad</a> |
| Supplementary Figure 7  | <a href="https://figshare.com/s/00039d2f1472d980fb15">https://figshare.com/s/00039d2f1472d980fb15</a> |
| Supplementary Figure 8  | <a href="https://figshare.com/s/19aa5c0c33dfbf52f76b">https://figshare.com/s/19aa5c0c33dfbf52f76b</a> |
| Supplementary Figure 9  | <a href="https://figshare.com/s/3b70b2174c355aafa4c8">https://figshare.com/s/3b70b2174c355aafa4c8</a> |
| Supplementary Figure 10 | <a href="https://figshare.com/s/2ed90596b1477259fc3f">https://figshare.com/s/2ed90596b1477259fc3f</a> |
| Supplementary Figure 11 | <a href="https://figshare.com/s/5c8b0c3c23600bd54b15">https://figshare.com/s/5c8b0c3c23600bd54b15</a> |
| Supplementary Figure 12 | <a href="https://figshare.com/s/2c1733efb6b877eed39a">https://figshare.com/s/2c1733efb6b877eed39a</a> |
| Supplementary Figure 13 | <a href="https://figshare.com/s/2a70a063f0dbda9c8bac">https://figshare.com/s/2a70a063f0dbda9c8bac</a> |
| Supplementary Figure 14 | <a href="https://figshare.com/s/58a4c79c1b31b4474c1c">https://figshare.com/s/58a4c79c1b31b4474c1c</a> |
| Supplementary Figure 15 | <a href="https://figshare.com/s/5ccc12c8bf07a477ab19">https://figshare.com/s/5ccc12c8bf07a477ab19</a> |
| Supplementary Figure 16 | <a href="https://figshare.com/s/64b5c5461c87858830e5">https://figshare.com/s/64b5c5461c87858830e5</a> |
| Supplementary Figure 17 | <a href="https://figshare.com/s/a950dec1eb4b32f8559a">https://figshare.com/s/a950dec1eb4b32f8559a</a> |
| Supplementary Movie 1   | <a href="https://figshare.com/s/5f3e5147898632f68274">https://figshare.com/s/5f3e5147898632f68274</a> |
| Supplementary Movie 2   | <a href="https://figshare.com/s/cdf6d880d1a241c750f4">https://figshare.com/s/cdf6d880d1a241c750f4</a> |
| Supplementary Movie 3   | <a href="https://figshare.com/s/5b6d3fb558aeb40771d2">https://figshare.com/s/5b6d3fb558aeb40771d2</a> |
| Supplementary Movie 4   | <a href="https://figshare.com/s/f2c26de3a7403d10148c">https://figshare.com/s/f2c26de3a7403d10148c</a> |
| Supplementary Movie 5   | <a href="https://figshare.com/s/03f83afad3ad6383aa20">https://figshare.com/s/03f83afad3ad6383aa20</a> |
| Supplementary Movie 6   | <a href="https://figshare.com/s/51aa1e42b4cb45ecdc60">https://figshare.com/s/51aa1e42b4cb45ecdc60</a> |
| Supplementary Movie 7   | <a href="https://figshare.com/s/415c7431de05ecfc5449">https://figshare.com/s/415c7431de05ecfc5449</a> |
| Supplementary Movie 8   | <a href="https://figshare.com/s/8a2169e10ff223bc971d">https://figshare.com/s/8a2169e10ff223bc971d</a> |
| Supplementary Movie 9   | <a href="https://figshare.com/s/a3aaebcb00ccb50f9b4d">https://figshare.com/s/a3aaebcb00ccb50f9b4d</a> |
| Supplementary Movie 10  | <a href="https://figshare.com/s/84ac6e35c61e47142339">https://figshare.com/s/84ac6e35c61e47142339</a> |
| Supplementary Movie 11  | <a href="https://figshare.com/s/b87dfe1d640a284edf86">https://figshare.com/s/b87dfe1d640a284edf86</a> |
| Supplementary Movie 12  | <a href="https://figshare.com/s/f74f27f17b2cb7343559">https://figshare.com/s/f74f27f17b2cb7343559</a> |
| Supplementary Movie 13  | <a href="https://figshare.com/s/b9f1f922f31ada373b87">https://figshare.com/s/b9f1f922f31ada373b87</a> |
| Supplementary Movie 14  | <a href="https://figshare.com/s/9a1291cd30650944a05f">https://figshare.com/s/9a1291cd30650944a05f</a> |
| Supplementary Movie 15  | <a href="https://figshare.com/s/3a08c958c980bb16c948">https://figshare.com/s/3a08c958c980bb16c948</a> |

|                        |                                                                                                       |
|------------------------|-------------------------------------------------------------------------------------------------------|
| Supplementary Movie 16 | <a href="https://figshare.com/s/5cd90d5c165d52dfa319">https://figshare.com/s/5cd90d5c165d52dfa319</a> |
| Supplementary Movie 17 | <a href="https://figshare.com/s/3bac7c34e759d5849442">https://figshare.com/s/3bac7c34e759d5849442</a> |
| Supplementary Movie 18 | <a href="https://figshare.com/s/db1b70cf18c9fe058a57">https://figshare.com/s/db1b70cf18c9fe058a57</a> |
| Supplementary Movie 19 | <a href="https://figshare.com/s/769438c9b5a3cfade65d">https://figshare.com/s/769438c9b5a3cfade65d</a> |

810



811

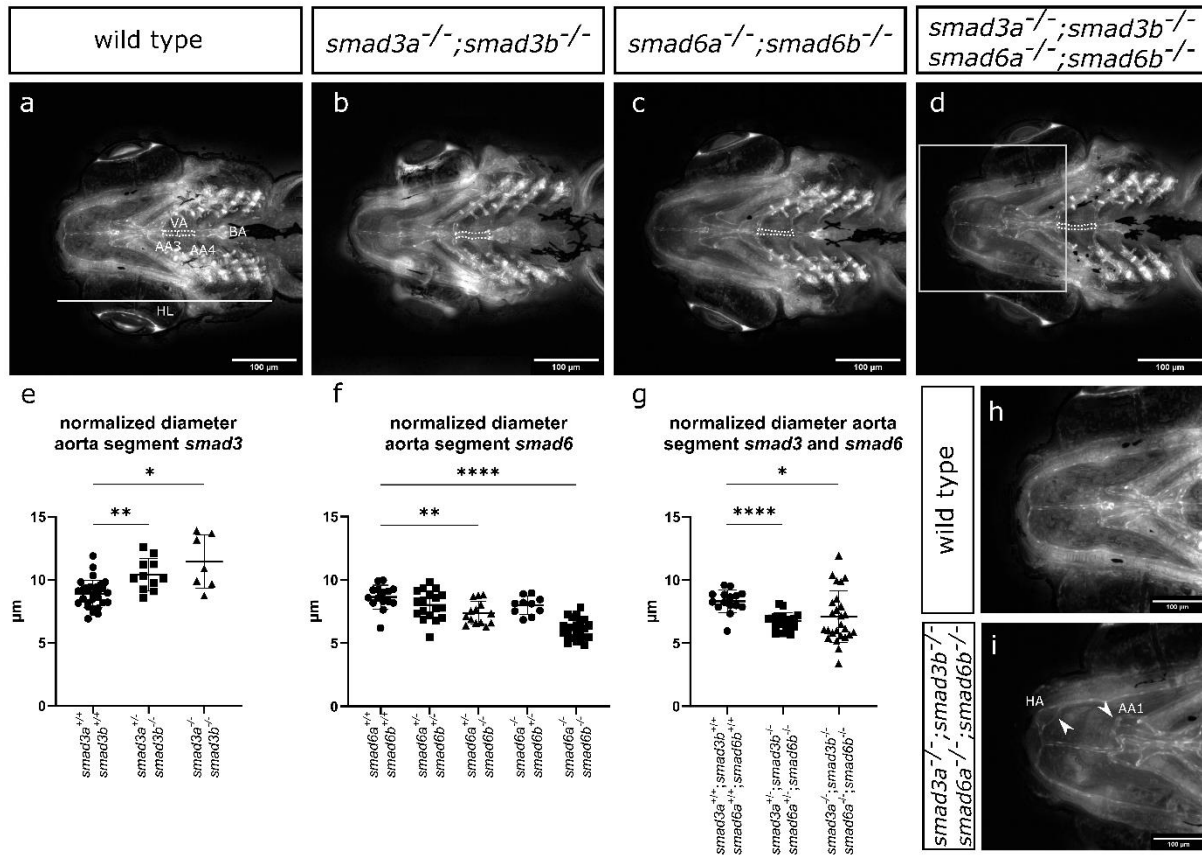

812

813 **Figure 1: Altered vasculogenesis at 10 dpf in double and qKO mutants. (a-d)**

814 Ventral view of the cardiovascular structures at 10 dpf of *smad* knockout lines crossed

815 with a *Tg(fli1:EGFP)* reporter line. Legend: “VA” ventral aorta, “BA” bulbus arteriosus,

816 “AA3” aortic arch 3, “AA4” aortic arch 4, “HL” head length. The projected surface area of

817 the ventral aorta between aortic arch 3 and aortic arch 4 has been outlined with a white

818 dashed line. **(e)** *smad3a*<sup>+/-</sup>;*smad3b*<sup>-/-</sup> and *smad3a*<sup>-/-</sup>;*smad3b*<sup>-/-</sup> zebrafish of 10 dpf show

819 an increase in normalized aorta diameter (n=29-11-7). **(f)** *smad6a*<sup>+/-</sup>;*smad6b*<sup>-/-</sup> as well as

820 *smad6a*<sup>-/-</sup>;*smad6b*<sup>-/-</sup> show a decrease in diameter of the ventral aorta (n=15-18-14-10-

821 23). **(g)** *smad3a*<sup>+/-</sup>;*smad3b*<sup>-/-</sup>;*smad6a*<sup>+/-</sup>;*smad6b*<sup>-/-</sup> and *smad3a*<sup>-/-</sup>;*smad3b*<sup>-/-</sup>;*smad6a*<sup>-/-</sup>-

822 ;*smad6b*<sup>-/-</sup> both show a decrease in diameter of the ventral aorta (n=15-18-26). **(h,i)**

823 Overview of the hypobranchial artery in a WT control and qKO zebrafish line. Tortuosity  
824 and irregular branching of the hypobranchial artery (HA) and aortic arch 1 (AA1) can be  
825 observed **(i)** magnification of boxed area in d. **(a-d,h,i)** stack focused Z-stack pictures  
826 obtained with ZEISS Axio Observer.Z1 microscope **(f)** One-way ANOVA with Dunnett's  
827 multiple comparison test against WT controls. **(e,g)** Brown-Forsythe and Welch ANOVA  
828 with Dunnett's T3 multiple comparison test against WT controls. Asterisks indicate  
829 significant differences. \* $p < 0.05$ , \*\* $p < 0.01$ , \*\*\* $p < 0.001$ , \*\*\*\* $p < 0.0001$ . Data represented  
830 as average  $\pm$  standard deviation.

831

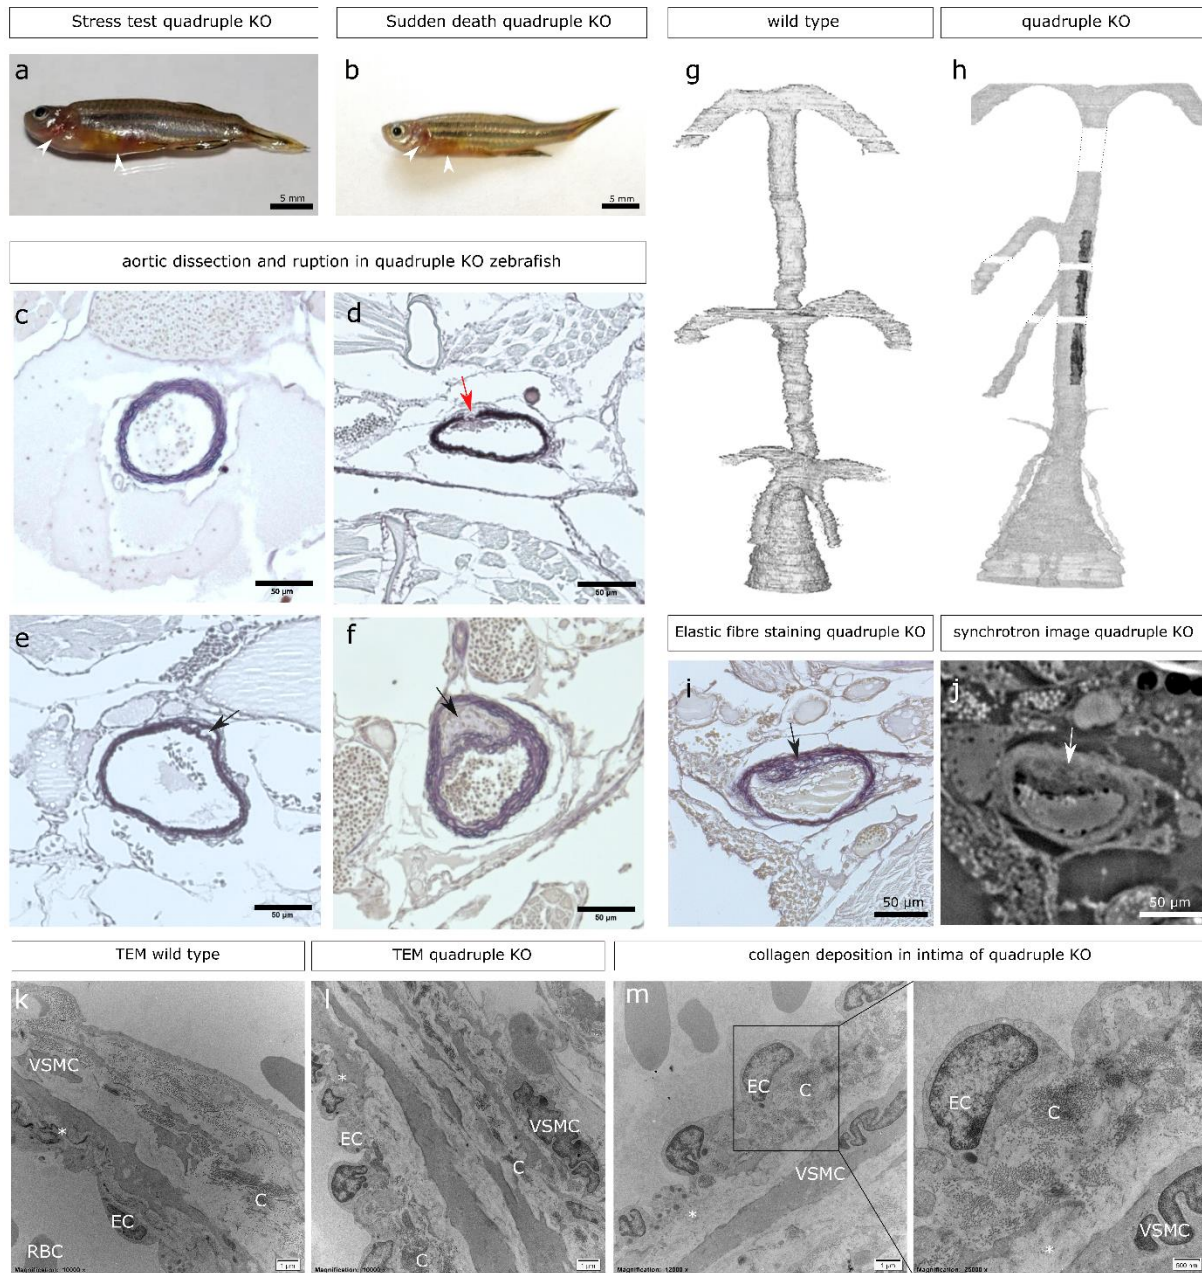

832

833 **Figure 2: qKO zebrafish exhibit thoracic aortic dissection and rupture. (a, b) qKO**

834 zebrafish that died suddenly show similar external features compared to qKO zebrafish

835 that die due to stress induction. Red discoloration around the heart and gill area

836 (anterior abdominal area) is indicated with a white arrowhead. (c) Resorcin-Fuchsin

837 staining of WT control. (d) Resorcin-Fuchsin staining of the elastic fiber on a 5 μm

838 cross-section of the ventral aorta shows rupture of the aortic wall (red arrow). **(e,f)**  
839 Resorcin-Fuchsin staining of the elastic fiber on 5 µm thick cross-sections of the ventral  
840 aorta. False lumen is indicated with a black arrow. **(g,h)** 3D reconstruction using 3D-  
841 modelling software Mimics 24.0 of the ventral aorta shows a decrease in diameter of the  
842 aortic arches. Symmetrical branching of the aortic arches is lost in the qKO model.  
843 Region with aortic damage has been colored black **(i,j)**. The area of damage identified  
844 on a histological resorcin-fuchsin staining of the ventral aorta can similarly be observed  
845 on a synchrotron micro-CT scan of the same region. Damage is indicated with arrows.  
846 **(k,l)** TEM of aortic wall in WT and qKO, respectively. Severe decrease of elastic fiber in  
847 the inner elastic lamina is apparent. **(m)** TEM of qKO shows collagen deposition in  
848 intima. **(k,l,m)** Legend: “VSMC” vascular smooth muscle cell, “EC” endothelial cell,  
849 “RBC” red blood cell, “C” collagen, \* indicates inner elastic lamina.

850



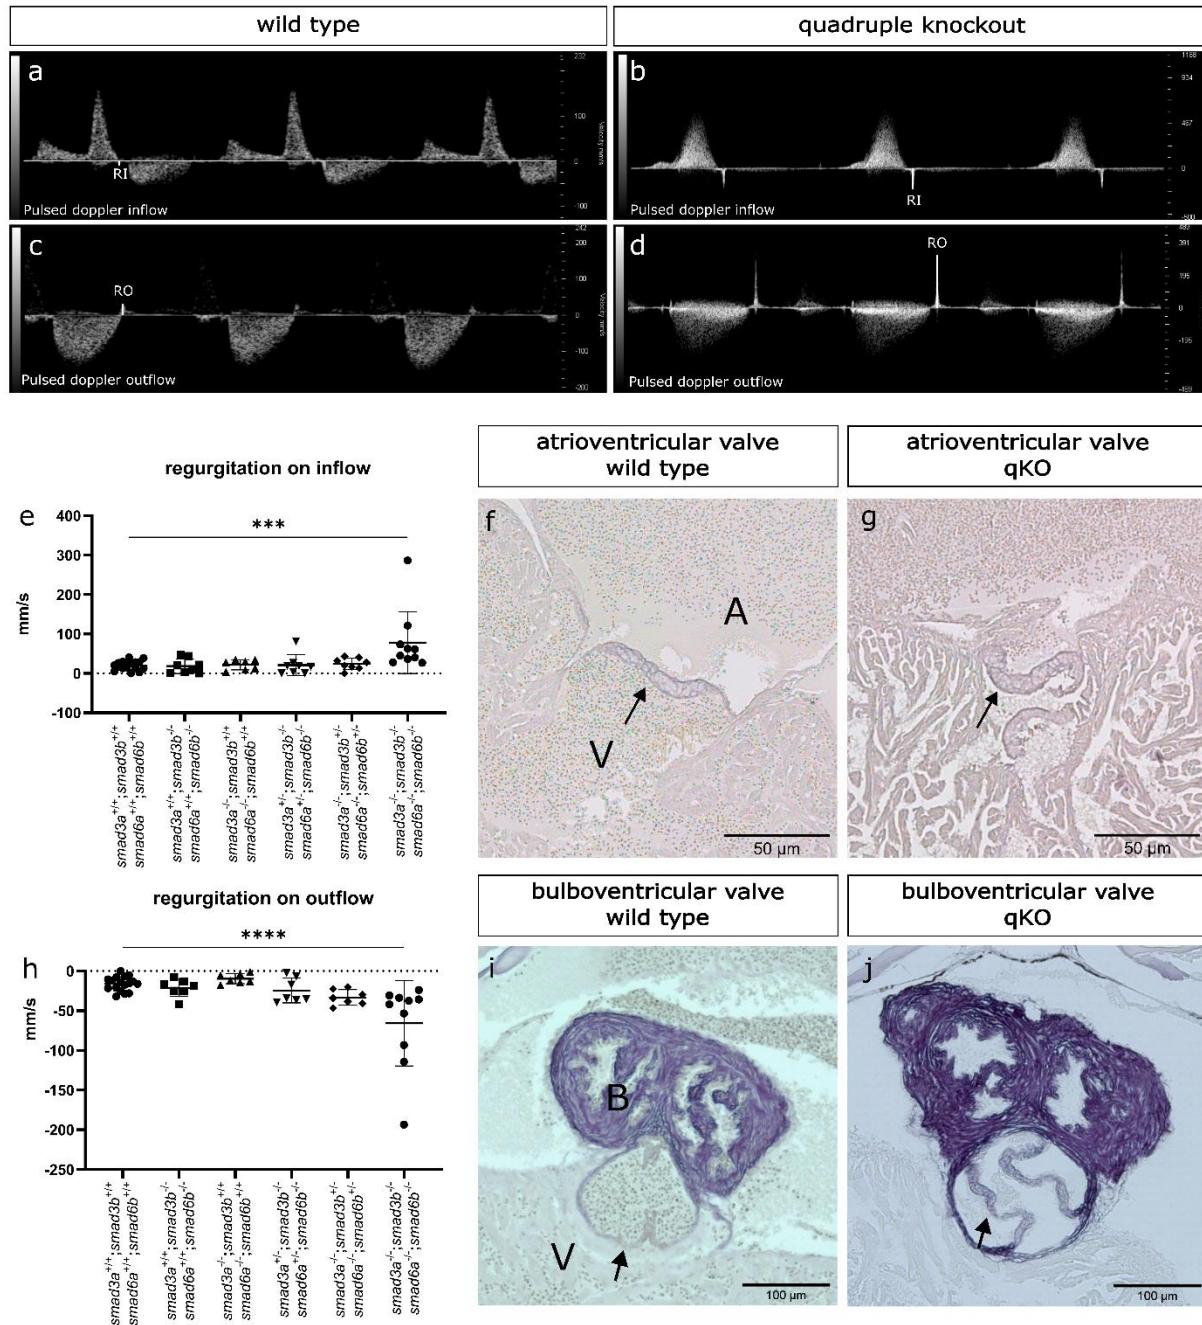

851

852 **Figure 3: Increased regurgitation and abnormal valve morphology in qKO**

853 **zebrafish. (a, c) Pulsed wave doppler of inflow (a) and outflow (c) of blood in and out of**

854 **the ventricle of WT control zebrafish. (b, d) Pulsed wave doppler of inflow (b) and**

855 **outflow (d) of blood in and out of the ventricle of qKO zebrafish. (e) Regurgitation on**

856 **inflow is significantly increased in the qKO zebrafish model (n=17-8-7-8-8-10). (f, g)**

857 Resorcin Fuchsin staining shows hypertrophy of the valve interstitial cells and abnormal  
858 leaflet morphology in the atrioventricular valve of qKO zebrafish. **(h)** Increased  
859 regurgitation on outflow in qKO (n=17-7-7-7-7-10). **(i,j)** Resorcin Fuchsin staining of the  
860 bulboventricular valve in WT and qKO zebrafish shows hypertrophy of the valve and  
861 altered orientation in the qKO. **(a-j)** Legend: “RI” regurgitation inflow, “RO” regurgitation  
862 outflow, “A” atrium, “V” ventricle, “B” bulbus arteriosus. Black arrows indicate valves.  
863 **(e,h)** One-way ANOVA with Dunnett’s multiple comparison test against WT controls.  
864 Asterisks indicate significant differences. \*\*\*p<0.001, \*\*\*\*p<0.0001. Data represented as  
865 average ± standard deviation.

866

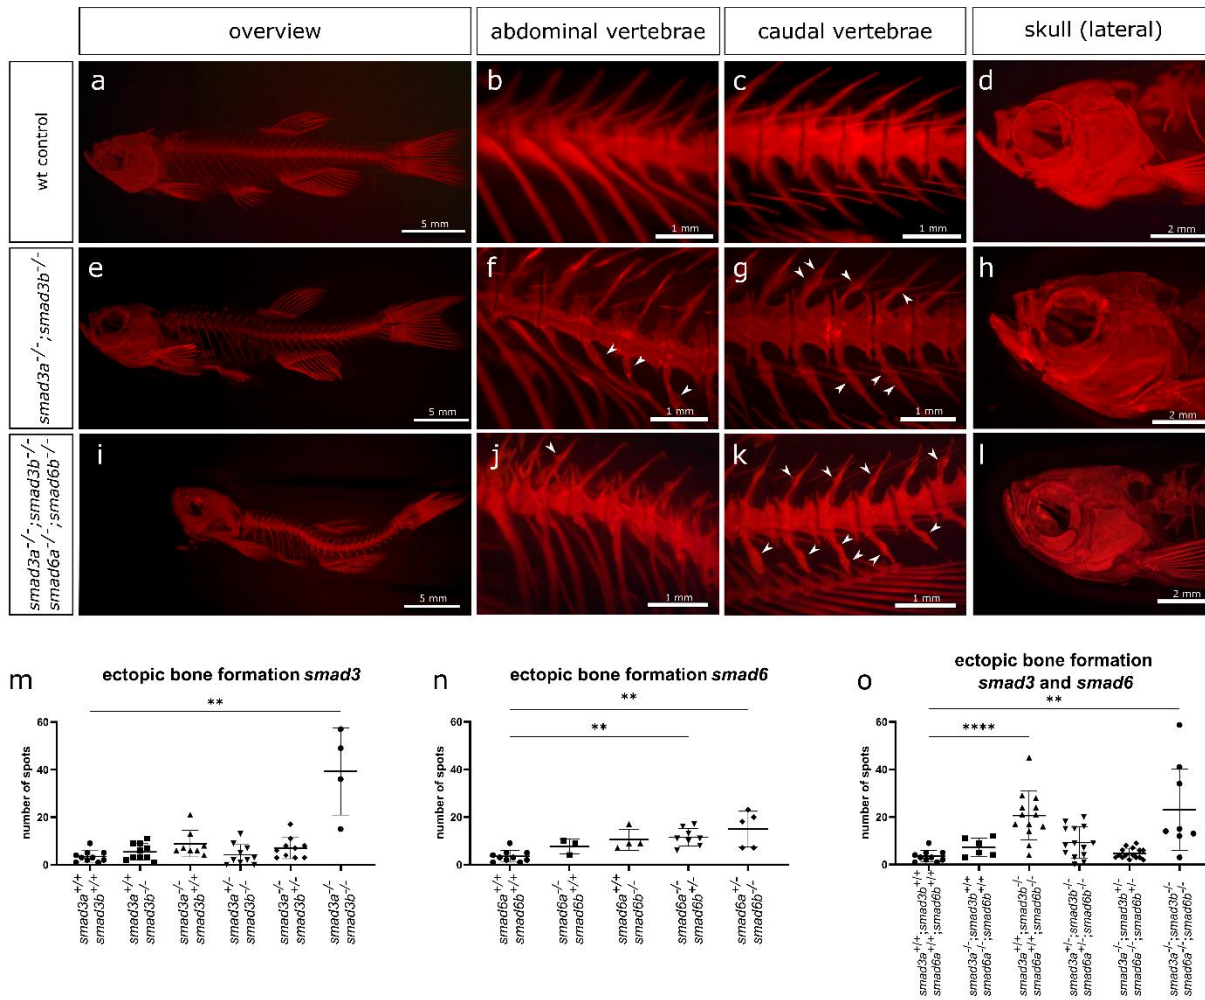

867

868 **Figure 4: qKO zebrafish show scoliosis, lordosis and ectopic bone formation in**  
 869 **the vertebral column. (a-l)** Overview pictures of alizarin red staining for mineralized  
 870 bone of abdominal and caudal vertebrae, and the skull (lateral view) of WT (a-d),  
 871 *smad3a*<sup>-/-</sup>;*smad3b*<sup>-/-</sup> DKO zebrafish (e-h), and *smad3a*<sup>-/-</sup>;*smad3b*<sup>-/-</sup>;*smad6a*<sup>-/-</sup>;*smad6b*<sup>-/-</sup>  
 872 qKO zebrafish (i-l). Ectopic bone has been indicated with white arrowheads. Scoliosis  
 873 and lordosis can be observed in (i). (k) Notochord sheet mineralization can also be  
 874 observed between the vertebrae. Small craniofacial aberrations are detected. (l) The  
 875 nasal bone structures appear to be missing, resulting in a clockwise rotation of the  
 876 snout. (m-o) Quantification of spots of ectopic bone in *smad3* (n=10-10-8-10-4),

877 *smad6* (n=10-4-3-8-5), *smad3/smad6* (n=10-6-13-14-15-8) genotypes. **(a-l)** Whole-  
878 mount alizarin red staining for mineralized bone pictures taken with Leica M165 FC  
879 Fluorescent Stereo Microscope. **(m-o)** Kruskal-Wallis test with Dunn's multiple  
880 comparisons test against WT controls. \*p<0.05, \*\*p<0.01, \*\*\*p<0.001, \*\*\*\*p<0.0001.  
881 Data represented as average  $\pm$  standard deviation.

882



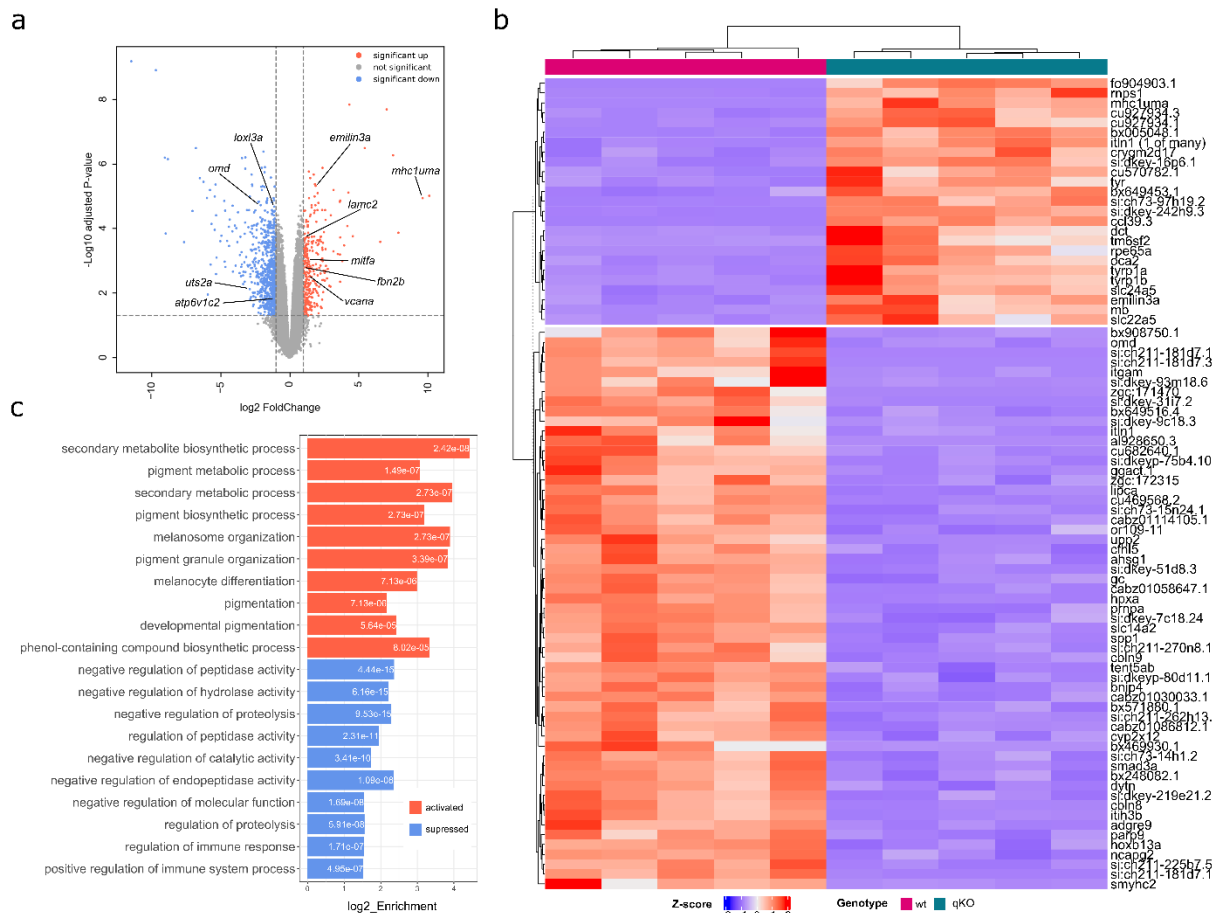

883

884 **Figure 5: RNA sequencing data shows downregulation of negative regulators of**

885 **proteolysis and upregulation of melanogenesis. (a)** Volcano Plot showing

886 upregulated genes (red) and downregulated genes (blue) with genes of importance

887 annotated. Thresholds:  $p_{\text{adjust}} \geq 0.05$  and  $|\log_2\text{FC}| \geq 1$ ; **(b)** Heatmap with top DEG

888 results between WT and qKO. Thresholds:  $p_{\text{adjust}} \geq 0.0001$  and  $|\log_2\text{FC}| \geq 1$ ; **(c)** Top

889 10 hits of GO enrichment analysis for both sets of upregulated (red) and downregulated

890 (blue) genes. Numbers inside the bars represent the corresponding adjusted p-value

891 value.

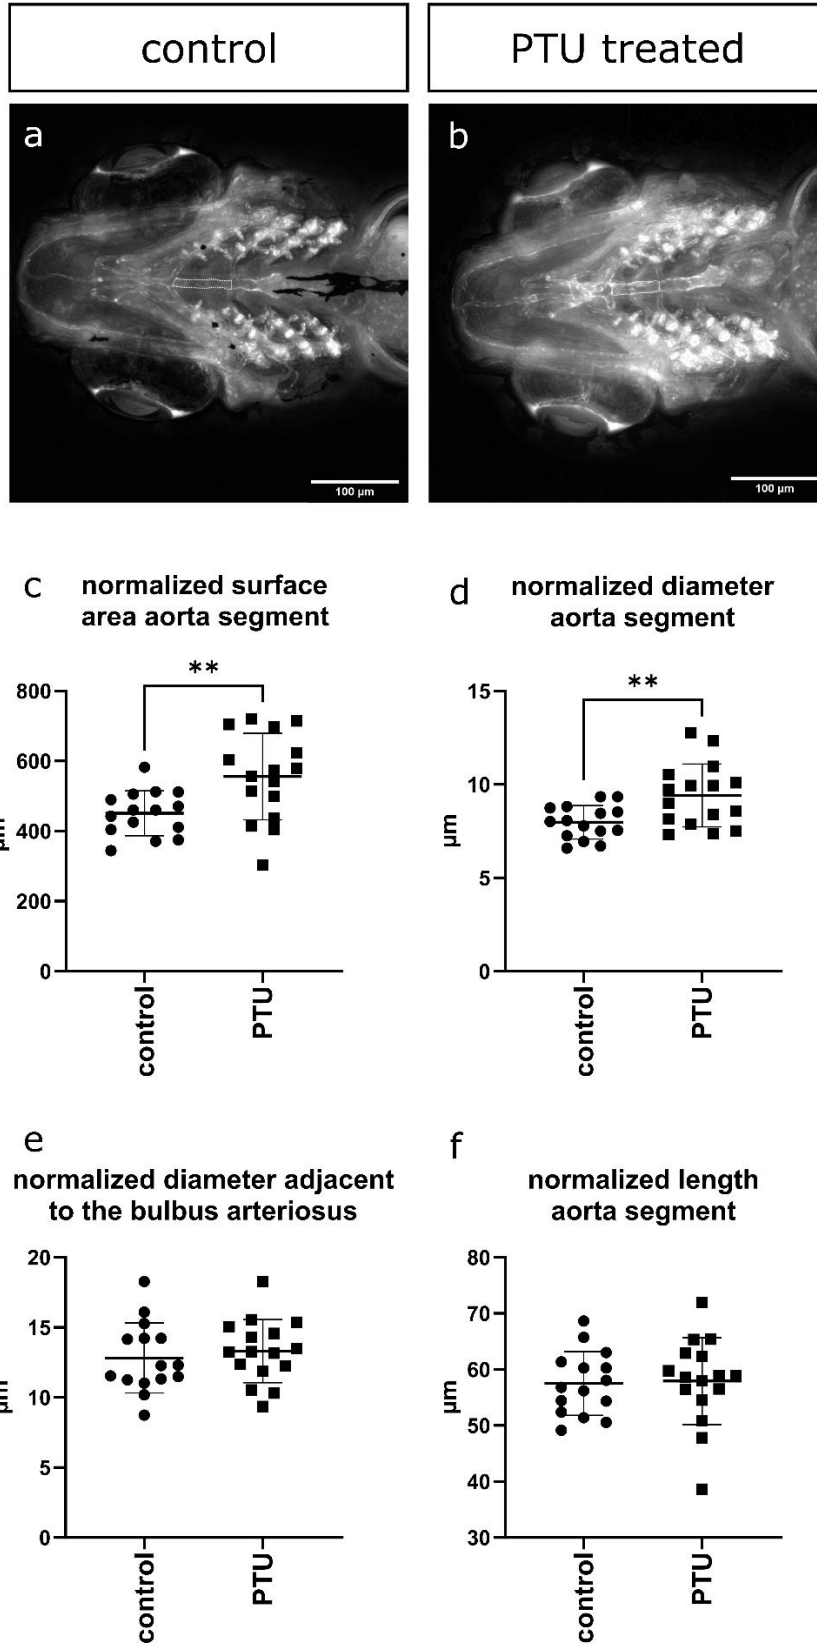

893 **Figure 6: Tyrosinase inhibition increases the aorta diameter of 10 dpf zebrafish.**

894 **(a)** Ventral view of the vasculature of 10 dpf WT control zebrafish. **(b)** Ventral view of  
895 the vasculature of 10 dpf WT zebrafish treated with 0.003% PTU treatment starting at  
896 24 hpf. **(c, d)** PTU-treated zebrafish show a significant increase in normalized surface  
897 area of the aortic segment and aortic diameter (n=15-16). **(e,f)** Normalized diameter  
898 adjacent to the bulbus arteriosus and length of the aorta segment is similar between  
899 treated and non-treated zebrafish (n=15-16). **(a,b)** Dashed white line indicates aorta  
900 segment between aortic arch 3 and 4. Stack focused Z-stack pictures obtained with  
901 ZEISS Axio Observer.Z1 microscope. **(c,d)** Unpaired two-tailed t-test with Welch's  
902 correction. **(e,f)** Unpaired two-tailed t-test. Asterisks indicate significant differences.  
903 \*\*p<0.01. Data represented as average  $\pm$  standard deviation.

904
